# Supplementary material for: Influence of water on crystallographic preferred orientation patterns in a naturally-deformed quartzite
Source: Copernicus journal article supplement (doi:10.5194/egusphere-2024-1567), 2024-06-04
Supplement: Supplementary file 1 [file egusphere-2024-1567-supplement.pdf]

**Supplement 1 - Data Table**

| FTIR grain # | EBSD # | Integrated absorbance ce thickness (microns) |    | Long |
|--------------|--------|----------------------------------------------|----|------|
| 1            | 10485  | 6.57                                         | 75 |      |
| 2            | 13240  | 35.37                                        | 77 |      |
| 3            | 13266  | 5.01                                         | 77 |      |
| 4            | 11001  | 10.98                                        | 75 |      |
| 5            | 10599  | 32.11                                        | 75 |      |
| 6            | 10193  | 49.81                                        | 76 |      |
| 7            | 13417  | 5.7                                          | 74 |      |
| 8            | 13437  | 26.81                                        | 73 |      |
| 9            | 13453  | 3.83                                         | 72 |      |
| 10           | 11230  | 4.11                                         | 72 |      |
| 11           | 13468  | 4.23                                         | 71 |      |
| 12           | 13502  | 92.96                                        | 71 |      |
| 13           | 11246  | 27.52                                        | 71 |      |
| 14           | 11151  | 50.92                                        | 72 |      |
| 15           | 13392  | 30.27                                        | 73 |      |
| 16           | 10554  | 28.34                                        | 74 |      |
| 17           | 10365  | 5.19                                         | 75 |      |
| 18           | 13172  | 6.1                                          | 78 |      |
| 19           | 13147  | 9.42                                         | 78 |      |
| 20           | 13066  | 2.17                                         | 79 |      |
| 21           | 13056  | 19.41                                        | 79 |      |
| 22           | 8496   | 4.256                                        | 80 |      |
| 23           | 8278   | 54.59                                        | 80 |      |
| 24           | 12970  | 3.18                                         | 80 |      |
| 25           | 7949   | 9.132                                        | 81 |      |
| 26           | 7570   | 41.74                                        | 82 |      |
| 27           | 8277   | 3.97                                         | 80 |      |
| 28           | 13000  | 24.11                                        | 79 |      |
| 29           | 12945  | 47.36                                        | 80 |      |
| 30           | 8287   | 5.84                                         | 79 |      |
| 31           | 9357   | 10.69                                        | 77 |      |
| 32           | 13122  | 5.83                                         | 77 |      |
| 33           | 12985  | 6.67                                         | 78 |      |
| 34           | 12944  | 84.07                                        | 79 |      |
| 35           | 8043   | 92.43                                        | 79 |      |
| 36           | 12873  | 2.74                                         | 81 |      |
| 37           | 7719   | 6.23                                         | 80 |      |
| 38           | 8777   | 18.87                                        | 78 |      |
| 39           | 13310  | 91.89                                        | 78 |      |
| 40           | 13291  | 26.65                                        | 77 |      |
| 41           | 10659  | 12.5                                         | 77 |      |
| 42           | 10631  | 4.38                                         | 76 |      |
| 43           | 13368  | 7.62                                         | 76 |      |
| 44           | 13371  | 5.64                                         | 76 |      |

|    |       |        |    |
|----|-------|--------|----|
| 45 | 10993 | 6.54   | 76 |
| 46 | 13428 | 22.1   | 75 |
| 47 | 10555 | 9.73   | 75 |
| 48 | 10935 | 8.09   | 74 |
| 49 | 11233 | 1.58   | 73 |
| 50 | 13430 | 12.08  | 74 |
| 51 | 13476 | 7.02   | 72 |
| 52 | 11447 | 6.26   | 72 |
| 53 | 11440 | 14.08  | 71 |
| 54 | 13479 | 26.47  | 72 |
| 55 | 11311 | 56.05  | 72 |
| 56 | 13450 | 69.33  | 73 |
| 57 | 13422 | 3.92   | 73 |
| 58 | 13161 | 8.07   | 79 |
| 59 | 12894 | 54.99  | 82 |
| 60 | 7215  | 21.36  | 83 |
| 61 | 12727 | 2.45   | 84 |
| 62 | 8175  | 6.21   | 81 |
| 63 | 12958 | 24.04  | 81 |
| 64 | 12912 | 4.93   | 82 |
| 65 | 12846 | 11.51  | 84 |
| 66 | 7349  | 9.4    | 82 |
| 67 | 12761 | 16.57  | 83 |
| 68 | 6900  | 12.35  | 83 |
| 69 | 12670 | 44.74  | 84 |
| 70 | 6480  | 49.14  | 84 |
| 71 | 12755 | 5.22   | 82 |
| 72 | 12789 | 8.14   | 82 |
| 73 | 12773 | 32.62  | 81 |
| 74 | 12767 | 5.33   | 81 |
| 75 | 12685 | 24.68  | 81 |
| 76 | 12717 | 99.18  | 82 |
| 77 | 12629 | 31.3   | 82 |
| 79 | 12355 | 13.62  | 87 |
| 80 | 5134  | 13.2   | 86 |
| 81 | 4863  | 15.9   | 87 |
| 82 | 12422 | 62.23  | 87 |
| 83 | 5357  | 17.14  | 87 |
| 84 | 12452 | 9.33   | 87 |
| 85 | 12273 | 22.09  | 88 |
| 86 | 12308 | 155.77 | 88 |
| 87 | 12264 | 39.39  | 88 |
| 88 | 12170 | 34.41  | 88 |
| 89 | 12117 | 49.96  | 89 |
| 90 | 12218 | 20.07  | 89 |
| 91 | 12175 | 16.89  | 89 |
| 92 | 12192 | 16.12  | 89 |

|     |       |        |    |
|-----|-------|--------|----|
| 93  | 12026 | 102.34 | 91 |
| 94  | 12008 | 6.7    | 91 |
| 95  | 2821  | 27.85  | 90 |
| 96  | 12037 | 42.26  | 91 |
| 97  | 11901 | 19.72  | 91 |
| 98  | 2324  | 11.39  | 91 |
| 99  | 11928 | 7.08   | 91 |
| 100 | 2118  | 6.11   | 92 |
| 101 | 11819 | 34.57  | 92 |
| 102 | 4294  | 28.54  | 87 |
| 103 | 4812  | 25.39  | 87 |
| 104 | 5197  | 5.24   | 86 |
| 105 | 12506 | 13.8   | 85 |
| 106 | 12538 | 76.79  | 85 |
| 107 | 12465 | 5.27   | 85 |
| 108 | 5133  | 14.98  | 86 |
| 109 | 4861  | 14.22  | 86 |
| 110 | 12375 | 30.86  | 87 |
| 111 | 4663  | 16.38  | 87 |
| 112 | 12353 | 13.92  | 87 |
| 113 | 4876  | 9.13   | 87 |
| 114 | 12325 | 4.26   | 87 |
| 115 | 4322  | 35.65  | 87 |
| 116 | 4195  | 21.07  | 87 |
| 117 | 4194  | 75.93  | 87 |
| 118 | 12323 | 61.48  | 87 |
| 119 | 12362 | 13.13  | 86 |
| 120 | 4478  | 98.11  | 87 |
| 121 | 12284 | 11.3   | 87 |
| 122 | 4260  | 11.54  | 87 |
| 123 | 12338 | 84.38  | 86 |
| 124 | 5079  | 28.96  | 85 |
| 125 | 5008  | 79.61  | 85 |
| 126 | 12306 | 9.94   | 86 |
| 127 | 12294 | 6.26   | 86 |
| 128 | 3669  | 31.59  | 86 |
| 129 | 12240 | 47.41  | 87 |
| 130 | 12151 | 10.02  | 87 |
| 131 | 3407  | 54.44  | 88 |
| 132 | 3180  | 14.25  | 88 |
| 133 | 3417  | 29.59  | 88 |
| 134 | 12092 | 11.86  | 88 |
| 135 | 12167 | 28.15  | 87 |
| 136 | 12022 | 28.74  | 88 |
| 137 | 2818  | 43.63  | 88 |
| 138 | 12036 | 109.56 | 89 |
| 139 | 2572  | 30.53  | 89 |

|     |       |        |    |
|-----|-------|--------|----|
| 140 | 2527  | 16.08  | 90 |
| 141 | 11847 | 28.47  | 91 |
| 142 | 1742  | 41.79  | 92 |
| 143 | 2246  | 23.61  | 91 |
| 144 | 2397  | 2.88   | 91 |
| 145 | 12010 | 22.67  | 90 |
| 146 | 12014 | 3.52   | 90 |
| 147 | 12033 | 21.06  | 90 |
| 148 | 11966 | 15.35  | 90 |
| 150 | 12763 | 5.29   | 85 |
| 151 | 12713 | 5.68   | 86 |
| 154 | 8905  | 14.44  | 83 |
| 155 | 12993 | 30.47  | 83 |
| 156 | 13033 | 6.42   | 82 |
| 157 | 12836 | 45.76  | 85 |
| 158 | 12936 | 5.98   | 83 |
| 159 | 7088  | 16.697 | 86 |
| 160 | 6844  | 14.73  | 86 |
| 161 | 12679 | 10.37  | 86 |
| 162 | 12666 | 70.03  | 86 |
| 163 | 5847  | 10.3   | 87 |
| 169 | 13358 | 16.24  | 80 |
| 170 | 10066 | 31.87  | 81 |
| 171 | 9958  | 4.51   | 82 |
| 172 | 9296  | 34.59  | 83 |
| 173 | 13136 | 21.42  | 84 |
| 174 | 9290  | 18.52  | 84 |
| 175 | 13179 | 7.82   | 84 |
| 176 | 13153 | 17.26  | 85 |
| 177 | 13126 | 40.9   | 85 |
| 178 | 13108 | 38.85  | 85 |
| 179 | 13091 | 14.58  | 85 |
| 180 | 13181 | 10.6   | 84 |
| 181 | 13208 | 16.83  | 84 |
| 182 | 10152 | 33.9   | 83 |
| 183 | 11017 | 42.33  | 81 |
| 184 | 10841 | 115.08 | 81 |
| 185 | 13389 | 26.01  | 81 |
| 186 | 10491 | 19.86  | 82 |
| 187 | 10213 | 41.18  | 82 |
| 188 | 10237 | 10.45  | 82 |
| 189 | 10052 | 11.15  | 83 |
| 190 | 9944  | 33.06  | 83 |
| 191 | 13079 | 9.99   | 85 |
| 193 | 8939  | 15.29  | 86 |
| 194 | 12987 | 8.4    | 87 |
| 195 | 12939 | 64.83  | 88 |

|     |       |        |    |
|-----|-------|--------|----|
| 196 | 12826 | 13.64  | 88 |
| 197 | 6936  | 32.29  | 89 |
| 198 | 7180  | 42.58  | 89 |
| 199 | 12744 | 23.31  | 90 |
| 200 | 12802 | 48.94  | 88 |
| 201 | 8650  | 23.99  | 86 |
| 202 | 12964 | 28.82  | 86 |
| 203 | 8067  | 46.58  | 86 |
| 204 | 12929 | 19.81  | 86 |
| 205 | 12905 | 11.44  | 88 |
| 206 | 7748  | 46.41  | 89 |
| 207 | 12804 | 24.37  | 89 |
| 208 | 7016  | 32.33  | 89 |
| 209 | 12780 | 7.04   | 89 |
| 210 | 12839 | 11.07  | 87 |
| 211 | 12861 | 65.46  | 87 |
| 212 | 12753 | 14.93  | 88 |
| 213 | 12707 | 32.15  | 89 |
| 214 | 12696 | 8.92   | 89 |
| 215 | 12709 | 10.45  | 89 |
| 219 | 9281  | 9.6    | 87 |
| 220 | 7913  | 6.93   | 88 |
| 221 | 7738  | 15.1   | 89 |
| 222 | 8321  | 14.02  | 88 |
| 223 | 13002 | 36.44  | 87 |
| 224 | 7303  | 30.73  | 89 |
| 225 | 12771 | 6.45   | 90 |
| 226 | 7290  | 19.94  | 89 |
| 227 | 12741 | 5.4    | 91 |
| 228 | 12736 | 16.29  | 91 |
| 229 | 6428  | 21.23  | 91 |
| 230 | 6184  | 45.09  | 92 |
| 231 | 5666  | 44.69  | 93 |
| 232 | 12483 | 38.61  | 93 |
| 233 | 12607 | 6.59   | 92 |
| 234 | 12613 | 40.98  | 92 |
| 235 | 12681 | 5.49   | 91 |
| 236 | 6329  | 13.26  | 92 |
| 237 | 12557 | 39.59  | 92 |
| 238 | 12482 | 35.52  | 92 |
| 239 | 5191  | 25.83  | 93 |
| 240 | 12440 | 105.72 | 93 |
| 241 | 12428 | 8.71   | 93 |
| 243 | 5088  | 29.18  | 93 |
| 244 | 12424 | 13.59  | 93 |
| 245 | 12461 | 59.34  | 93 |
| 246 | 5349  | 36.44  | 93 |

|     |       |        |    |
|-----|-------|--------|----|
| 247 | 12462 | 31.37  | 93 |
| 248 | 5760  | 16.83  | 92 |
| 249 | 5932  | 52.26  | 91 |
| 250 | 12552 | 10.99  | 91 |
| 251 | 12543 | 7.59   | 91 |
| 252 | 12647 | 96.91  | 90 |
| 253 | 12711 | 43.15  | 90 |
| 254 | 6657  | 28.47  | 90 |
| 255 | 12520 | 40.89  | 91 |
| 256 | 5500  | 18.85  | 92 |
| 257 | 12539 | 75.12  | 92 |
| 258 | 12576 | 60.31  | 91 |
| 259 | 12553 | 48     | 91 |
| 260 | 5348  | 11.53  | 91 |
| 261 | 5064  | 15.66  | 91 |
| 262 | 4914  | 17.52  | 92 |
| 263 | 5100  | 17.74  | 92 |
| 264 | 4819  | 17.04  | 92 |
| 265 | 12391 | 30.81  | 92 |
| 266 | 4820  | 27.78  | 92 |
| 267 | 12327 | 36.04  | 94 |
| 268 | 12296 | 63.24  | 94 |
| 269 | 4077  | 27.52  | 94 |
| 270 | 12320 | 24.77  | 94 |
| 271 | 12336 | 24.24  | 94 |
| 272 | 12363 | 16.11  | 94 |
| 273 | 4143  | 36.77  | 95 |
| 274 | 12209 | 21.7   | 95 |
| 275 | 3384  | 7.11   | 96 |
| 276 | 2952  | 110.16 | 96 |
| 277 | 12075 | 34.35  | 96 |
| 278 | 2585  | 16.71  | 96 |
| 279 | 11991 | 43.98  | 97 |
| 280 | 11906 | 5.9    | 97 |
| 281 | 2519  | 26.15  | 97 |
| 282 | 2703  | 16.43  | 92 |
| 283 | 12099 | 3.98   | 96 |
| 284 | 12153 | 14.91  | 96 |
| 285 | 12914 | 32.09  | 95 |
| 286 | 12234 | 49.97  | 95 |
| 287 | 12252 | 31.73  | 95 |
| 288 | 3963  | 7.35   | 95 |
| 289 | 12222 | 14.58  | 95 |
| 292 | 12283 | 22.56  | 95 |
| 293 | 12341 | 27.1   | 95 |
| 294 | 4751  | 14.54  | 94 |
| 295 | 12433 | 42.2   | 94 |

|     |       |       |    |
|-----|-------|-------|----|
| 296 | 5192  | 25.82 | 94 |
| 297 | 12434 | 15.19 | 94 |
| 299 | 5489  | 10.25 | 93 |
| 300 | 12561 | 67.59 | 93 |
| 302 | 3769  | 75.6  | 95 |
| 303 | 12191 | 6.08  | 95 |
| 304 | 3434  | 36.54 | 95 |
| 305 | 12180 | 13.97 | 95 |
| 306 | 12130 | 34.53 | 96 |
| 307 | 12108 | 32.66 | 96 |
| 308 | 12045 | 11.01 | 96 |
| 309 | 2718  | 17.89 | 96 |
| 311 | 2727  | 24.26 | 96 |
| 312 | 12076 | 5.78  | 96 |
| 313 | 2433  | 40.15 | 96 |
| 314 | 2289  | 21.29 | 96 |
| 315 | 2565  | 14.35 | 96 |
| 316 | 11934 | 4.4   | 97 |
| 318 | 11943 | 5.53  | 96 |
| 319 | 11834 | 4.86  | 97 |
| 320 | 1801  | 14.08 | 97 |
| 321 | 11831 | 13.24 | 97 |
| 322 | 1757  | 70.21 | 97 |
| 323 | 11803 | 5.71  | 97 |
| 324 | 1271  | 11.35 | 98 |
| 325 | 1078  | 7.61  | 98 |
| 326 | 1179  | 14.17 | 98 |
| 327 | 11677 | 11.71 | 98 |
| 328 | 11708 | 13.91 | 98 |
| 329 | 1241  | 35.11 | 98 |
| 330 | 11718 | 40.68 | 98 |
| 331 | 11772 | 22.53 | 98 |
| 332 | 11812 | 3.56  | 98 |
| 333 | 1802  | 82.82 | 98 |
| 334 | 2015  | 35.77 | 97 |
| 335 | 11878 | 11.88 | 97 |
| 336 | 11857 | 70.17 | 97 |
| 337 | 11825 | 99.04 | 97 |
| 338 | 11925 | 37.73 | 97 |
| 339 | 1879  | 12.89 | 97 |
| 340 | 1746  | 50.71 | 97 |
| 341 | 1452  | 31.08 | 97 |
| 342 | 11802 | 12.49 | 97 |
| 343 | 11759 | 7.31  | 97 |
| 344 | 985   | 30.61 | 98 |
| 345 | 1154  | 34.08 | 97 |
| 346 | 11707 | 31.87 | 97 |

|     |       |        |    |
|-----|-------|--------|----|
| 347 | 11748 | 8.71   | 97 |
| 348 | 11715 | 18.77  | 97 |
| 349 | 11663 | 12.7   | 97 |
| 350 | 11682 | 42.33  | 97 |
| 351 | 11854 | 16.73  | 96 |
| 352 | 11896 | 13.53  | 96 |
| 353 | 11770 | 43.01  | 96 |
| 354 | 11747 | 50.74  | 96 |
| 355 | 11723 | 11.06  | 97 |
| 356 | 1144  | 112.34 | 97 |
| 357 | 11668 | 38.43  | 97 |
| 358 | 877   | 7.88   | 97 |
| 359 | 11842 | 11.12  | 96 |
| 360 | 11910 | 124.76 | 96 |
| 361 | 11933 | 37.35  | 96 |
| 362 | 11941 | 24.21  | 96 |
| 363 | 2475  | 79.06  | 96 |
| 364 | 2562  | 26.58  | 95 |
| 365 | 12077 | 19.39  | 95 |
| 366 | 1984  | 35.33  | 96 |
| 367 | 2607  | 76.49  | 95 |
| 369 | 11983 | 7.65   | 95 |
| 370 | 11959 | 16.75  | 95 |
| 371 | 11761 | 81.57  | 96 |
| 372 | 11743 | 48.78  | 96 |
| 373 | 11816 | 40.88  | 96 |
| 374 | 11786 | 26.12  | 95 |
| 375 | 11871 | 12.14  | 95 |
| 376 | 1904  | 36.46  | 95 |
| 377 | 11841 | 54.37  | 95 |
| 378 | 11924 | 11.17  | 94 |
| 379 | 11971 | 6.84   | 94 |
| 380 | 2269  | 26.72  | 94 |
| 381 | 2134  | 2.48   | 94 |
| 382 | 2298  | 31.89  | 94 |
| 383 | 1446  | 19.45  | 95 |
| 384 | 1230  | 16     | 95 |
| 385 | 11729 | 30.81  | 95 |
| 386 | 1552  | 7.82   | 95 |
| 387 | 11916 | 27.79  | 94 |
| 388 | 11824 | 46.96  | 94 |
| 389 | 11788 | 19.29  | 94 |
| 390 | 1684  | 14.09  | 94 |
| 392 | 11815 | 17.27  | 94 |
| 393 | 11948 | 79.13  | 93 |
| 394 | 11836 | 4.21   | 93 |
| 395 | 11830 | 18.74  | 93 |



|     |       |       |    |
|-----|-------|-------|----|
| 396 | 11775 | 48.09 | 94 |
| 397 | 1206  | 21.13 | 94 |
| 398 | 11737 | 11.98 | 94 |
| 399 | 11714 | 9.5   | 94 |
| 400 | 11703 | 5.7   | 94 |
| 401 | 11648 | 7.6   | 95 |
| 402 | 11656 | 42.25 | 95 |
| 403 | 11695 | 9.97  | 95 |
| 404 | 981   | 11.76 | 94 |
| 405 | 11690 | 9.91  | 94 |
| 406 | 11951 | 15.38 | 93 |
| 407 | 12002 | 28.73 | 93 |
| 408 | 2500  | 54.28 | 93 |
| 409 | 12061 | 48.57 | 92 |
| 410 | 12081 | 25.59 | 92 |
| 411 | 12139 | 13.21 | 91 |
| 412 | 3512  | 89.94 | 92 |
| 413 | 3230  | 22.7  | 92 |
| 414 | 12255 | 6.83  | 91 |
| 415 | 3430  | 47.64 | 92 |
| 416 | 12204 | 41.26 | 92 |
| 417 | 3376  | 20.05 | 92 |
| 418 | 12112 | 11.92 | 92 |
| 419 | 12220 | 28.64 | 91 |
| 420 | 12246 | 19.1  | 91 |
| 421 | 12300 | 3.87  | 91 |
| 422 | 4576  | 13.81 | 91 |
| 423 | 4173  | 42.97 | 91 |
| 424 | 12416 | 62.71 | 90 |
| 425 | 12317 | 44.42 | 91 |
| 426 | 12295 | 32.41 | 91 |
| 427 | 12321 | 5.66  | 91 |
| 428 | 12466 | 5.95  | 90 |
| 429 | 12415 | 15.9  | 90 |
| 430 | 4709  | 46.67 | 91 |
| 431 | 12429 | 46.55 | 90 |
| 432 | 12430 | 22.5  | 90 |
| 433 | 12459 | 18.18 | 90 |
| 434 | 5741  | 17.93 | 89 |
| 435 | 5335  | 26.69 | 90 |
| 436 | 12532 | 19.3  | 89 |
| 437 | 5276  | 16.65 | 89 |
| 438 | 5770  | 14.76 | 89 |
| 439 | 4772  | 5.1   | 89 |
| 440 | 12390 | 1.73  | 92 |
| 441 | 12359 | 26.7  | 92 |
| 442 | 4487  | 31.18 | 92 |

|     |       |        |    |
|-----|-------|--------|----|
| 443 | 4350  | 16.69  | 93 |
| 444 | 12315 | 62.08  | 92 |
| 445 | 12275 | 23.93  | 93 |
| 446 | 12221 | 11.09  | 94 |
| 447 | 3999  | 16.09  | 93 |
| 448 | 12193 | 27.13  | 94 |
| 449 | 3869  | 10.26  | 94 |
| 450 | 12107 | 6.59   | 95 |
| 451 | 12065 | 65.73  | 95 |
| 452 | 12449 | 5.94   | 88 |
| 453 | 4263  | 11.6   | 89 |
| 454 | 4684  | 16.66  | 89 |
| 455 | 12385 | 9.41   | 88 |
| 456 | 5165  | 2.63   | 88 |
| 457 | 5426  | 7.9    | 87 |
| 458 | 4683  | 106.71 | 88 |
| 459 | 4563  | 13.18  | 88 |
| 460 | 4416  | 7.38   | 89 |
| 461 | 12309 | 9.71   | 89 |
| 462 | 12250 | 20.68  | 90 |
| 463 | 4249  | 48.22  | 90 |
| 464 | 12259 | 12.23  | 90 |
| 465 | 12230 | 21.11  | 90 |
| 466 | 12115 | 30.7   | 90 |
| 467 | 12050 | 71.6   | 90 |
| 468 | 11930 | 27.23  | 93 |
| 469 | 11721 | 15.51  | 93 |
| 470 | 1389  | 33.09  | 93 |
| 471 | 11976 | 27.63  | 92 |
| 472 | 11944 | 16.35  | 92 |
| 473 | 2604  | 39.54  | 92 |
| 474 | 3083  | 34.3   | 92 |
| 475 | 12126 | 97.78  | 92 |
| 476 | 4935  | 53.94  | 88 |
| 477 | 12441 | 23.59  | 87 |
| 478 | 4758  | 28.46  | 88 |
| 479 | 4520  | 21.73  | 88 |
| 480 | 4150  | 28.62  | 88 |
| 481 | 12249 | 27.16  | 89 |
| 482 | 860   | 42.83  | 93 |
| 483 | 11685 | 32.37  | 93 |
| 484 | 11670 | 18.72  | 94 |
| 485 | 11669 | 59.53  | 93 |
| 486 | 11890 | 83.05  | 93 |
| 487 | 11868 | 65.62  | 93 |
| 488 | 12866 | 4.42   | 86 |
| 489 | 7820  | 9.45   | 86 |

|     |       |        |    |
|-----|-------|--------|----|
| 490 | 7877  | 15.86  | 86 |
| 491 | 12800 | 70.36  | 87 |
| 492 | 12811 | 33.42  | 87 |
| 493 | 9076  | 34.78  | 84 |
| 494 | 8696  | 37.18  | 84 |
| 495 | 8524  | 19.36  | 85 |
| 496 | 13003 | 24.52  | 85 |
| 497 | 8608  | 33.17  | 84 |
| 498 | 8247  | 48.5   | 85 |
| 499 | 7909  | 8.21   | 86 |
| 500 | 8064  | 25.4   | 85 |
| 501 | 12995 | 18.39  | 85 |
| 502 | 12823 | 19.86  | 86 |
| 503 | 7817  | 41.54  | 85 |
| 504 | 7763  | 31.27  | 85 |
| 505 | 8088  | 17.99  | 84 |
| 506 | 7564  | 19.08  | 85 |
| 507 | 7876  | 31.96  | 85 |
| 508 | 7411  | 63.13  | 86 |
| 509 | 12824 | 38.69  | 86 |
| 510 | 7052  | 21.22  | 86 |
| 511 | 12739 | 10.04  | 87 |
| 512 | 6871  | 37.86  | 87 |
| 513 | 7089  | 18.91  | 87 |
| 514 | 6960  | 13.61  | 86 |
| 515 | 6406  | 23.32  | 87 |
| 516 | 12658 | 31.84  | 88 |
| 517 | 12575 | 18.27  | 88 |
| 518 | 12626 | 48.01  | 87 |
| 519 | 12959 | 25.27  | 84 |
| 520 | 8128  | 62.73  | 84 |
| 521 | 7904  | 21.05  | 84 |
| 522 | 7660  | 36.75  | 84 |
| 523 | 12828 | 42.88  | 85 |
| 524 | 9249  | 13.72  | 81 |
| 525 | 9277  | 15.29  | 80 |
| 526 | 13041 | 95.998 | 82 |
| 527 | 13020 | 11.48  | 82 |
| 528 | 13025 | 34.49  | 82 |
| 529 | 13149 | 13.26  | 80 |
| 530 | 9526  | 26.75  | 79 |
| 531 | 9446  | 60.82  | 80 |
| 532 | 13201 | 29.68  | 79 |
| 533 | 9774  | 28.9   | 79 |
| 534 | 13299 | 15.23  | 78 |
| 535 | 13324 | 12.79  | 77 |
| 536 | 10448 | 13.68  | 76 |

|     |       |        |    |
|-----|-------|--------|----|
| 537 | 10123 | 37.04  | 77 |
| 538 | 10290 | 40.78  | 77 |
| 539 | 13329 | 19.07  | 77 |
| 540 | 13376 | 13.49  | 76 |
| 541 | 9730  | 8.31   | 74 |
| 542 | 13188 | 20.17  | 74 |
| 543 | 9608  | 26.77  | 74 |
| 544 | 9574  | 10.21  | 75 |
| 545 | 13203 | 10.88  | 75 |
| 546 | 9257  | 28.3   | 76 |
| 547 | 13250 | 26.88  | 74 |
| 548 | 10436 | 35.26  | 73 |
| 549 | 13334 | 17.88  | 73 |
| 550 | 13271 | 20.78  | 74 |
| 551 | 10705 | 41.77  | 73 |
| 552 | 10811 | 48.49  | 72 |
| 553 | 11082 | 28.61  | 72 |
| 554 | 13424 | 42.58  | 72 |
| 555 | 13369 | 48.47  | 72 |
| 556 | 13444 | 32.069 | 71 |
| 557 | 11243 | 43.12  | 71 |
| 558 | 13478 | 28.67  | 70 |
| 559 | 13489 | 27.14  | 69 |
| 560 | 13488 | 10.19  | 69 |
| 561 | 11291 | 15.648 | 70 |
| 562 | 11427 | 20.89  | 68 |
| 563 | 13460 | 22.76  | 69 |
| 564 | 13501 | 11.71  | 67 |
| 565 | 11338 | 10.61  | 68 |
| 566 | 13473 | 21.65  | 67 |
| 567 | 13458 | 42.57  | 68 |
| 568 | 13427 | 20.59  | 68 |
| 569 | 11471 | 8.06   | 66 |
| 570 | 13433 | 12.68  | 68 |
| 571 | 13421 | 59.65  | 68 |
| 572 | 10623 | 5.68   | 70 |
| 573 | 13323 | 12.16  | 70 |
| 574 | 13352 | 9.35   | 70 |
| 575 | 13355 | 26.698 | 71 |
| 576 | 11010 | 61.02  | 70 |
| 577 | 13385 | 51.397 | 70 |
| 578 | 11081 | 9.44   | 70 |
| 579 | 13435 | 33.26  | 69 |
| 580 | 13438 | 4.93   | 70 |
| 582 | 13403 | 7.03   | 70 |
| 583 | 13356 | 77.05  | 71 |
| 584 | 13328 | 10.46  | 71 |

|     |       |        |    |
|-----|-------|--------|----|
| 585 | 10315 | 24.07  | 72 |
| 586 | 10245 | 23.19  | 71 |
| 587 | 10263 | 24.52  | 72 |
| 588 | 9778  | 17.99  | 73 |
| 589 | 13312 | 51.898 | 71 |
| 590 | 13261 | 28.73  | 71 |
| 591 | 13235 | 33.39  | 72 |
| 592 | 13262 | 44.44  | 74 |
| 593 | 13295 | 18.23  | 73 |
| 594 | 13301 | 38.74  | 72 |
| 595 | 13330 | 24.16  | 72 |
| 596 | 13315 | 26.82  | 72 |
| 597 | 13219 | 20.64  | 73 |
| 598 | 13227 | 19.46  | 73 |
| 599 | 9486  | 40.99  | 74 |
| 600 | 9455  | 56.03  | 74 |
| 601 | 13148 | 8.17   | 74 |
| 602 | 13103 | 60.16  | 75 |
| 603 | 9202  | 28.85  | 74 |
| 604 | 13076 | 57.82  | 76 |
| 605 | 9180  | 20.01  | 76 |
| 606 | 8900  | 26.71  | 75 |
| 607 | 13014 | 7.796  | 77 |
| 608 | 13019 | 13.49  | 77 |
| 609 | 8598  | 37.01  | 77 |
| 610 | 8253  | 7.85   | 78 |
| 611 | 12979 | 30.59  | 78 |
| 612 | 8121  | 31.12  | 78 |
| 613 | 12923 | 26.74  | 78 |
| 614 | 12921 | 8.08   | 78 |
| 615 | 12904 | 25.57  | 79 |
| 616 | 12814 | 13.98  | 79 |
| 617 | 7422  | 18.84  | 79 |
| 618 | 12845 | 27.02  | 79 |
| 619 | 12903 | 83.59  | 78 |
| 620 | 12745 | 11.51  | 80 |
| 621 | 12747 | 69.12  | 80 |
| 622 | 12722 | 10.17  | 80 |
| 623 | 12779 | 42.02  | 79 |
| 624 | 6858  | 18.896 | 78 |
| 625 | 6693  | 70.31  | 79 |
| 626 | 12669 | 12.68  | 79 |
| 627 | 12706 | 17.05  | 78 |
| 628 | 12770 | 24.87  | 77 |
| 629 | 12726 | 30.54  | 78 |
| 630 | 12778 | 41.71  | 78 |
| 631 | 7418  | 5.45   | 76 |

|     |       |        |      |
|-----|-------|--------|------|
| 632 | 12844 | 61.27  | 76   |
| 633 | 12834 | 26.23  | 76   |
| 634 | 12858 | 30.15  | 75   |
| 635 | 12792 | 10.99  | 76   |
| 636 | 7771  | 7.84   | 75   |
| 637 | 12919 | 7.196  | 74   |
| 638 | 12891 | 14.31  | 75   |
| 639 | 7958  | 14.51  | 75   |
| 640 | 8272  | 44.4   | 74   |
| 641 | 13096 | 36.03  | 72   |
| 642 | 13081 | 16.38  | 71   |
| 643 | 9189  | 13.02  | 71   |
| 644 | 13109 | 17.31  | 71   |
| 645 | 13051 | 17.09  | 72   |
| 646 | 13169 | 42.17  | 70   |
| 647 | 9795  | 5.77   | 70   |
| 648 | 13186 | 28.25  | 71   |
| 649 | 9429  | 2.18   | 72   |
| 650 | 9116  | 34.11  | 72   |
| 651 | 9742  | 48.63  | 71   |
| 652 | 10111 | 13.37  | 69   |
| 653 | 13335 | 11.98  | 68   |
| 654 | 13305 | 33.38  | 68   |
| 655 | 13363 | 55.59  | 68   |
| 657 | 11060 | 6.78   | 67   |
| 658 | 13418 | 31.13  | 68   |
| 659 | 13426 | 21.69  | 67   |
| 660 | 10844 | 43.08  | 68   |
| 661 | 13353 | 6.48   | 69   |
| 662 | 13313 | 7.74   | 70   |
| 663 | 13255 | 9.53   | 71   |
| 664 | 10730 | 39.51  | 69   |
| 665 | 13374 | 7.81   | 68   |
| 666 | 11240 | 8.57   | 65   |
| 667 | 11104 | 19.98  | 66   |
| 668 | 11007 | 32.99  | 66   |
| 670 | 13475 | 54.597 | 64   |
| 671 | 13483 | 4.695  | 64   |
| 672 | 13498 | 17.89  | 63   |
| 673 | 13487 | 7.89   | 64   |
| 674 | 13465 | 11.02  | 65   |
| 675 | 11414 | 32.71  | 65   |
| 676 | 11403 | 58.7   | 66   |
| 677 | 11324 | 31.74  | 67   |
| 678 | 13432 | 27.68  | 66   |
| 679 | 13425 | 20.2   | 67   |
| 680 | 13480 | 42.17  | 65.5 |

|     |       |        |    |
|-----|-------|--------|----|
| 681 | 9595  | 5.08   | 72 |
| 682 | 13135 | 7.47   | 73 |
| 683 | 13198 | 40.62  | 73 |
| 684 | 9157  | 18.73  | 73 |
| 685 | 13088 | 35.29  | 74 |
| 686 | 13042 | 23.64  | 75 |
| 687 | 13059 | 43.99  | 75 |
| 688 | 8169  | 47.88  | 76 |
| 689 | 12953 | 25.58  | 76 |
| 690 | 12884 | 13.096 | 77 |
| 691 | 12892 | 16.99  | 76 |
| 692 | 12840 | 32.87  | 77 |
| 693 | 12830 | 13.98  | 78 |
| 694 | 12932 | 50.85  | 76 |
| 695 | 13024 | 31.97  | 74 |
| 696 | 12949 | 37.27  | 75 |
| 697 | 8970  | 8.53   | 73 |
| 698 | 13037 | 45.32  | 73 |
| 699 | 12996 | 40.08  | 74 |
| 700 | 8297  | 22.98  | 74 |
| 701 | 8510  | 21.69  | 73 |
| 702 | 8824  | 24.08  | 73 |
| 703 | 13100 | 12.01  | 73 |
| 704 | 9396  | 58.08  | 72 |
| 705 | 9605  | 15.82  | 72 |
| 706 | 13247 | 38.63  | 70 |
| 707 | 12859 | 18.61  | 74 |
| 708 | 7605  | 6.23   | 74 |
| 709 | 12895 | 40.35  | 73 |
| 710 | 7292  | 15.5   | 75 |
| 711 | 12776 | 16.37  | 76 |
| 712 | 6877  | 21.32  | 76 |
| 713 | 6807  | 10.98  | 76 |
| 714 | 12699 | 18.78  | 77 |
| 715 | 12648 | 57.14  | 77 |
| 716 | 12513 | 16.02  | 79 |
| 717 | 12509 | 46.799 | 79 |
| 718 | 5024  | 6.21   | 80 |
| 719 | 5253  | 10.796 | 80 |
| 720 | 4929  | 23.76  | 81 |
| 721 | 12495 | 35.81  | 80 |
| 722 | 5746  | 7.89   | 80 |
| 723 | 5126  | 14.13  | 81 |
| 724 | 5455  | 23.31  | 81 |
| 725 | 12608 | 18.02  | 79 |
| 726 | 12660 | 29.42  | 78 |
| 727 | 6172  | 14.97  | 78 |

|     |       |        |    |
|-----|-------|--------|----|
| 728 | 12633 | 34.19  | 78 |
| 729 | 6536  | 8.95   | 77 |
| 730 | 12593 | 22.08  | 80 |
| 731 | 5715  | 38.04  | 81 |
| 732 | 5312  | 26.88  | 81 |
| 733 | 5656  | 61.099 | 81 |
| 734 | 6264  | 25.54  | 80 |
| 735 | 12673 | 24.98  | 80 |
| 736 | 12602 | 13.89  | 82 |
| 737 | 5926  | 35.42  | 82 |
| 738 | 12545 | 35.439 | 82 |
| 739 | 4659  | 22.99  | 81 |
| 740 | 12360 | 20.11  | 82 |
| 741 | 4516  | 21.85  | 83 |
| 742 | 12304 | 20.37  | 82 |
| 743 | 4011  | 22.13  | 84 |
| 744 | 12186 | 48.54  | 84 |
| 745 | 4177  | 42.61  | 84 |
| 746 | 12254 | 30.84  | 85 |
| 747 | 4210  | 26.67  | 84 |
| 748 | 4302  | 9.93   | 84 |
| 749 | 12298 | 12.29  | 84 |
| 750 | 4534  | 15.13  | 84 |
| 751 | 4833  | 45.31  | 83 |
| 752 | 4546  | 57.01  | 83 |
| 753 | 12456 | 54.07  | 83 |
| 754 | 12411 | 14.038 | 83 |
| 755 | 12426 | 6.96   | 83 |
| 756 | 4673  | 14.27  | 84 |
| 757 | 4598  | 9.35   | 84 |
| 758 | 12322 | 5.48   | 85 |
| 759 | 12277 | 31.14  | 85 |
| 760 | 3874  | 46.91  | 86 |
| 761 | 12261 | 30.29  | 86 |
| 762 | 12215 | 8.43   | 85 |
| 763 | 3503  | 34.62  | 85 |
| 764 | 12136 | 4.69   | 85 |
| 765 | 3307  | 18.68  | 85 |
| 766 | 12100 | 33.71  | 86 |
| 767 | 3331  | 26.27  | 86 |
| 768 | 12085 | 31.12  | 87 |
| 769 | 2492  | 15.07  | 87 |
| 770 | 2453  | 32.56  | 88 |
| 771 | 2224  | 42.63  | 89 |
| 772 | 11927 | 38.16  | 89 |
| 773 | 11962 | 31.53  | 89 |
| 774 | 11862 | 26.52  | 89 |



|     |       |        |    |
|-----|-------|--------|----|
| 775 | 2187  | 29.46  | 88 |
| 776 | 11887 | 52.32  | 88 |
| 777 | 11904 | 5.82   | 88 |
| 778 | 11899 | 34.1   | 88 |
| 780 | 11961 | 3.497  | 87 |
| 781 | 2684  | 4.73   | 87 |
| 782 | 2534  | 35.68  | 87 |
| 784 | 12013 | 6.05   | 86 |
| 785 | 12047 | 85.17  | 86 |
| 786 | 12069 | 25.52  | 86 |
| 787 | 11960 | 7.25   | 86 |
| 788 | 12058 | 54.94  | 86 |
| 789 | 3093  | 53.75  | 85 |
| 790 | 3252  | 18.04  | 85 |
| 791 | 3224  | 43.13  | 84 |
| 792 | 3237  | 30.55  | 84 |
| 793 | 12213 | 37.12  | 84 |
| 794 | 3900  | 49.37  | 83 |
| 795 | 3629  | 21.56  | 83 |
| 796 | 12232 | 17.68  | 82 |
| 797 | 12287 | 23.88  | 82 |
| 798 | 12122 | 17.71  | 84 |
| 799 | 3387  | 17.61  | 83 |
| 800 | 12102 | 40.25  | 84 |
| 801 | 3000  | 45.31  | 83 |
| 802 | 12083 | 12.01  | 85 |
| 803 | 12057 | 4.39   | 85 |
| 804 | 2566  | 15.26  | 85 |
| 805 | 2381  | 60.71  | 86 |
| 806 | 12034 | 43.11  | 85 |
| 807 | 2790  | 32.21  | 84 |
| 808 | 11907 | 2.48   | 86 |
| 809 | 11837 | 16.83  | 86 |
| 810 | 11843 | 5.37   | 87 |
| 812 | 11774 | 53.82  | 88 |
| 813 | 11705 | 49.98  | 89 |
| 814 | 11662 | 24.42  | 90 |
| 815 | 11702 | 10.45  | 89 |
| 817 | 747   | 19.464 | 89 |
| 818 | 11627 | 22.81  | 90 |
| 819 | 697   | 14.77  | 90 |
| 820 | 11612 | 18.43  | 91 |
| 821 | 11626 | 16.23  | 90 |
| 822 | 11630 | 11.23  | 90 |
| 823 | 777   | 9.599  | 90 |
| 824 | 990   | 34.42  | 90 |
| 825 | 11731 | 15.89  | 90 |

|     |       |        |    |
|-----|-------|--------|----|
| 826 | 11728 | 17.81  | 90 |
| 827 | 11664 | 51.73  | 90 |
| 828 | 11651 | 4.71   | 91 |
| 829 | 11628 | 28.07  | 91 |
| 830 | 11618 | 13.29  | 91 |
| 831 | 11633 | 39.67  | 91 |
| 832 | 881   | 32.27  | 91 |
| 833 | 11757 | 36.66  | 90 |
| 834 | 11777 | 15.54  | 90 |
| 835 | 11716 | 19.21  | 90 |
| 836 | 11683 | 41.25  | 91 |
| 837 | 11654 | 4.72   | 89 |
| 838 | 11674 | 12.93  | 88 |
| 839 | 1135  | 33.47  | 87 |
| 840 | 1180  | 13.37  | 87 |
| 841 | 947   | 20.93  | 87 |
| 842 | 11655 | 15.32  | 87 |
| 843 | 705   | 47.02  | 88 |
| 844 | 1055  | 61.12  | 87 |
| 845 | 11726 | 177.2  | 87 |
| 846 | 1307  | 6.84   | 87 |
| 847 | 11856 | 23.72  | 86 |
| 848 | 11813 | 7.6    | 87 |
| 849 | 11799 | 18.94  | 87 |
| 850 | 11776 | 128.67 | 87 |
| 851 | 1095  | 30.54  | 88 |
| 852 | 700   | 4.69   | 89 |
| 853 | 569   | 2.53   | 89 |
| 855 | 575   | 39.58  | 89 |
| 856 | 11596 | 13.73  | 90 |
| 857 | 11595 | 18.42  | 90 |
| 858 | 11614 | 5.79   | 90 |
| 859 | 469   | 4.64   | 91 |
| 860 | 11584 | 8.49   | 91 |
| 861 | 11569 | 83.57  | 91 |
| 862 | 11567 | 69.72  | 91 |
| 863 | 11568 | 16.79  | 91 |
| 864 | 435   | 22.51  | 90 |
| 865 | 11573 | 1.73   | 90 |
| 867 | 11607 | 2.79   | 88 |
| 868 | 616   | 3.7    | 88 |
| 869 | 11605 | 36.75  | 89 |
| 870 | 11624 | 3.38   | 88 |
| 871 | 617   | 41.75  | 90 |
| 872 | 572   | 45.91  | 91 |
| 873 | 11592 | 39.91  | 91 |
| 874 | 11583 | 11.58  | 91 |

|     |       |        |    |
|-----|-------|--------|----|
| 875 | 11572 | 76.41  | 92 |
| 876 | 11547 | 19.47  | 92 |
| 877 | 11561 | 17.18  | 92 |
| 878 | 11565 | 18.36  | 92 |
| 879 | 399   | 16.72  | 93 |
| 880 | 11564 | 42.21  | 92 |
| 881 | 11577 | 11.02  | 92 |
| 882 | 11581 | 15.16  | 92 |
| 883 | 11593 | 31.3   | 92 |
| 884 | 11599 | 60.32  | 92 |
| 885 | 525   | 34.59  | 92 |
| 886 | 523   | 15.81  | 91 |
| 887 | 581   | 43.4   | 91 |
| 888 | 11598 | 35.17  | 91 |
| 889 | 11603 | 70.55  | 91 |
| 890 | 11609 | 14.65  | 91 |
| 891 | 598   | 9.81   | 91 |
| 892 | 652   | 37.5   | 91 |
| 893 | 615   | 36.999 | 91 |
| 894 | 559   | 37.25  | 92 |
| 895 | 11608 | 21.36  | 92 |
| 896 | 442   | 45.67  | 93 |
| 897 | 483   | 39.33  | 92 |
| 898 | 11566 | 16.6   | 92 |
| 899 | 11571 | 32.55  | 92 |
| 900 | 353   | 39.14  | 93 |
| 901 | 11552 | 43.64  | 93 |
| 902 | 11546 | 96.16  | 93 |
| 903 | 264   | 29.02  | 93 |
| 904 | 11522 | 21.42  | 93 |
| 905 | 11512 | 11.1   | 94 |
| 906 | 11499 | 31.06  | 94 |
| 907 | 115   | 18.58  | 94 |
| 908 | 11491 | 34.05  | 94 |
| 909 | 170   | 68.21  | 93 |
| 910 | 36    | 38.13  | 94 |
| 911 | 11504 | 40.79  | 93 |
| 912 | 11511 | 3.42   | 93 |
| 913 | 11533 | 4.12   | 93 |
| 914 | 11545 | 8.27   | 93 |
| 915 | 206   | 16.88  | 93 |
| 916 | 11524 | 45.65  | 93 |
| 917 | 84    | 12.57  | 93 |
| 918 | 11540 | 49.82  | 92 |
| 919 | 11535 | 37.4   | 92 |
| 920 | 370   | 4.15   | 91 |
| 921 | 11554 | 27.39  | 91 |

|     |       |        |    |
|-----|-------|--------|----|
| 922 | 395   | 37.64  | 91 |
| 923 | 282   | 21.92  | 91 |
| 924 | 255   | 26.91  | 92 |
| 925 | 214   | 11.59  | 92 |
| 926 | 11534 | 4.43   | 91 |
| 927 | 151   | 18.54  | 92 |
| 928 | 11497 | 18.8   | 93 |
| 929 | 11507 | 92.44  | 92 |
| 930 | 11515 | 16.15  | 93 |
| 931 | 127   | 30.59  | 93 |
| 932 | 97    | 19.1   | 93 |
| 933 | 11482 | 22.27  | 93 |
| 934 | 189   | 17.4   | 92 |
| 935 | 11517 | 64.84  | 92 |
| 936 | 11549 | 9.15   | 91 |
| 938 | 11538 | 15.8   | 91 |
| 939 | 11556 | 49.83  | 89 |
| 940 | 393   | 48.66  | 89 |
| 941 | 11575 | 22.74  | 90 |
| 942 | 11574 | 43.28  | 90 |
| 943 | 11509 | 13.96  | 91 |
| 944 | 11516 | 137.14 | 91 |
| 945 | 146   | 22.28  | 91 |
| 946 | 11500 | 46.53  | 91 |
| 947 | 134   | 14.93  | 92 |
| 948 | 11486 | 10.25  | 92 |
| 949 | 11501 | 9.34   | 90 |
| 950 | 11526 | 14.03  | 90 |
| 951 | 2046  | 31.49  | 87 |
| 952 | 1992  | 12.83  | 87 |
| 953 | 11760 | 45.91  | 89 |
| 954 | 11785 | 24.97  | 89 |
| 955 | 1582  | 27.84  | 89 |
| 956 | 11826 | 14.47  | 89 |
| 957 | 1655  | 60.82  | 89 |
| 958 | 11850 | 93.49  | 89 |
| 959 | 11884 | 71.87  | 89 |
| 960 | 11792 | 33.04  | 90 |
| 961 | 11805 | 71.799 | 88 |
| 962 | 11784 | 31.94  | 89 |
| 963 | 1244  | 21.93  | 89 |
| 964 | 11800 | 108.93 | 87 |
| 965 | 1337  | 16.08  | 87 |
| 966 | 11713 | 35.66  | 87 |
| 967 | 1293  | 27.31  | 88 |
| 968 | 12066 | 17.27  | 87 |
| 969 | 3256  | 24.88  | 87 |

|      |       |       |    |
|------|-------|-------|----|
| 970  | 12123 | 46.86 | 87 |
| 971  | 3727  | 30.93 | 86 |
| 972  | 12210 | 9.23  | 86 |
| 973  | 3574  | 7.2   | 87 |
| 974  | 3340  | 35.36 | 87 |
| 975  | 12349 | 15.9  | 84 |
| 976  | 12383 | 5.69  | 84 |
| 977  | 12412 | 39.56 | 84 |
| 978  | 12414 | 31.34 | 84 |
| 979  | 12405 | 65.79 | 84 |
| 980  | 5368  | 9.36  | 84 |
| 981  | 12493 | 44.73 | 83 |
| 982  | 5480  | 6.94  | 84 |
| 983  | 5130  | 8.84  | 84 |
| 984  | 6186  | 23.73 | 83 |
| 985  | 5975  | 6.09  | 83 |
| 986  | 12581 | 17.85 | 84 |
| 987  | 6141  | 20.17 | 83 |
| 988  | 12662 | 4.51  | 83 |
| 989  | 6392  | 31.91 | 82 |
| 990  | 6005  | 5.6   | 84 |
| 991  | 12528 | 7.01  | 84 |
| 992  | 5559  | 22.18 | 85 |
| 993  | 6176  | 33.67 | 84 |
| 994  | 6401  | 33.25 | 83 |
| 995  | 5331  | 34.11 | 84 |
| 996  | 12485 | 7.49  | 84 |
| 997  | 12546 | 47.7  | 83 |
| 998  | 6733  | 47.03 | 82 |
| 999  | 12712 | 31.04 | 82 |
| 1000 | 6818  | 7.73  | 82 |

| z axis length (mic | axis length (mic | Aspect ratio | Euler angle 1 (radial | angle 2 (radia |
|--------------------|------------------|--------------|-----------------------|----------------|
| 444.93             | 90.08            | 4.94         | 2.554                 | 2.130          |
| 356.80             | 147.29           | 2.42         | 0.602                 | 1.724          |
| 277.39             | 224.68           | 1.24         | 3.023                 | 1.653          |
| 286.57             | 101.03           | 2.84         | 0.264                 | 1.845          |
| 128.68             | 67.55            | 1.91         | 2.465                 | 0.820          |
| 129.63             | 48.33            | 2.68         | 0.559                 | 2.221          |
| 312.14             | 126.66           | 2.46         | 0.083                 | 1.951          |
| 194.07             | 104.42           | 1.86         | 0.228                 | 1.362          |
| 218.35             | 81.35            | 2.68         | 2.878                 | 2.547          |
| 148.68             | 78.96            | 1.88         | 2.067                 | 0.312          |
| 146.72             | 98.69            | 1.49         | 2.878                 | 1.817          |
| 296.51             | 108.45           | 2.73         | 2.532                 | 1.506          |
| 174.07             | 72.82            | 2.39         | 3.070                 | 2.049          |
| 196.98             | 95.38            | 2.07         | 0.437                 | 1.977          |
| 155.04             | 92.11            | 1.68         | 0.409                 | 1.823          |
| 298.55             | 93.87            | 3.18         | 2.658                 | 0.312          |
| 189.26             | 104.75           | 1.81         | 0.786                 | 1.333          |
| 182.93             | 88.76            | 2.06         | 2.994                 | 2.330          |
| 217.39             | 85.26            | 2.55         | 2.352                 | 2.409          |
| 141.02             | 124.89           | 1.13         | 0.253                 | 1.433          |
| 150.72             | 116.45           | 1.29         | 0.680                 | 2.250          |
| 118.56             | 49.70            | 2.39         | 0.125                 | 2.466          |
| 209.51             | 74.74            | 2.80         | 0.324                 | 2.788          |
| 146.25             | 132.31           | 1.11         | 6.242                 | 1.731          |
| 281.70             | 69.67            | 4.04         | 0.202                 | 0.924          |
| 118.94             | 68.07            | 1.75         | 0.324                 | 1.280          |
| 154.67             | 45.01            | 3.44         | 2.978                 | 2.250          |
| 147.80             | 53.96            | 2.74         | 0.851                 | 1.708          |
| 218.31             | 119.10           | 1.83         | 2.138                 | 1.319          |
| 220.16             | 65.55            | 3.36         | 1.096                 | 2.757          |
| 247.18             | 113.68           | 2.17         | 0.179                 | 2.367          |
| 395.85             | 125.12           | 3.16         | 2.765                 | 1.869          |
| 129.83             | 52.34            | 2.48         | 2.651                 | 1.757          |
| 199.80             | 87.46            | 2.29         | 0.591                 | 1.475          |
| 248.39             | 123.47           | 2.01         | 2.743                 | 1.934          |
| 420.76             | 130.83           | 3.22         | 6.084                 | 2.261          |
| 302.94             | 46.40            | 6.53         | 2.448                 | 2.197          |
| 169.35             | 49.20            | 3.44         | 2.622                 | 1.914          |
| 227.16             | 154.29           | 1.47         | 1.767                 | 1.425          |
| 171.50             | 71.50            | 2.40         | 0.226                 | 2.457          |
| 148.71             | 52.05            | 2.86         | 1.077                 | 0.358          |
| 220.72             | 65.60            | 3.37         | 2.613                 | 0.870          |
| 169.22             | 89.44            | 1.89         | 2.782                 | 1.649          |
| 211.84             | 90.40            | 2.34         | 2.162                 | 1.263          |

|        |        |      |       |       |
|--------|--------|------|-------|-------|
| 162.01 | 50.70  | 3.20 | 1.961 | 2.342 |
| 324.91 | 119.90 | 2.71 | 0.204 | 1.165 |
| 99.63  | 40.71  | 2.45 | 3.389 | 2.440 |
| 231.88 | 69.12  | 3.36 | 2.772 | 1.047 |
| 176.06 | 73.65  | 2.39 | 2.580 | 1.979 |
| 200.69 | 62.01  | 3.24 | 6.224 | 2.191 |
| 119.58 | 46.97  | 2.55 | 2.335 | 1.511 |
| 290.63 | 79.05  | 3.68 | 0.372 | 1.572 |
| 218.97 | 92.61  | 2.37 | 0.018 | 2.496 |
| 89.71  | 36.00  | 2.49 | 2.167 | 1.436 |
| 91.34  | 71.29  | 1.28 | 3.239 | 2.146 |
| 346.01 | 104.26 | 3.32 | 2.048 | 1.322 |
| 226.17 | 68.75  | 3.29 | 0.212 | 2.425 |
| 236.78 | 121.31 | 1.95 | 2.858 | 1.344 |
| 348.05 | 120.76 | 2.88 | 0.675 | 1.752 |
| 425.61 | 103.02 | 4.13 | 1.231 | 1.962 |
| 130.24 | 59.15  | 2.20 | 2.960 | 2.335 |
| 284.57 | 51.27  | 5.55 | 0.827 | 0.839 |
| 118.79 | 80.81  | 1.47 | 3.006 | 1.436 |
| 210.62 | 82.75  | 2.55 | 2.057 | 1.565 |
| 363.95 | 145.57 | 2.50 | 2.857 | 1.770 |
| 283.66 | 86.17  | 3.29 | 2.641 | 1.481 |
| 365.55 | 147.06 | 2.49 | 3.892 | 3.001 |
| 225.66 | 96.85  | 2.33 | 2.553 | 1.050 |
| 195.80 | 117.41 | 1.67 | 3.152 | 1.621 |
| 123.23 | 56.66  | 2.18 | 0.278 | 1.233 |
| 178.82 | 60.53  | 2.95 | 2.686 | 1.711 |
| 252.51 | 62.12  | 4.07 | 2.430 | 1.871 |
| 338.57 | 100.04 | 3.38 | 2.398 | 1.240 |
| 204.07 | 118.41 | 1.72 | 6.027 | 2.670 |
| 173.99 | 104.55 | 1.66 | 0.626 | 0.911 |
| 226.66 | 57.03  | 3.97 | 0.971 | 1.545 |
| 90.13  | 41.55  | 2.17 | 0.442 | 2.243 |
| 276.60 | 78.56  | 3.52 | 2.943 | 2.181 |
| 129.98 | 96.71  | 1.34 | 3.055 | 1.329 |
| 87.06  | 73.26  | 1.19 | 2.934 | 1.503 |
| 207.14 | 63.83  | 3.25 | 0.547 | 1.569 |
| 135.30 | 59.69  | 2.27 | 2.819 | 1.622 |
| 169.50 | 74.38  | 2.28 | 0.837 | 1.355 |
| 224.81 | 149.17 | 1.51 | 1.795 | 1.536 |
| 171.34 | 98.25  | 1.74 | 0.818 | 2.292 |
| 114.35 | 59.25  | 1.93 | 1.724 | 1.792 |
| 321.47 | 60.36  | 5.33 | 2.676 | 0.499 |
| 208.88 | 36.40  | 5.74 | 0.312 | 0.981 |
| 151.95 | 81.34  | 1.87 | 0.112 | 1.607 |
| 139.00 | 60.46  | 2.30 | 3.117 | 2.148 |
| 144.63 | 49.79  | 2.91 | 3.277 | 1.891 |

|        |        |      |       |       |
|--------|--------|------|-------|-------|
| 133.48 | 86.86  | 1.54 | 0.060 | 1.333 |
| 129.10 | 71.72  | 1.80 | 2.212 | 1.101 |
| 475.59 | 177.78 | 2.68 | 0.637 | 2.003 |
| 155.43 | 100.97 | 1.54 | 2.906 | 1.858 |
| 337.11 | 103.21 | 3.27 | 0.316 | 1.698 |
| 189.15 | 55.25  | 3.42 | 0.916 | 2.613 |
| 183.48 | 74.54  | 2.46 | 0.558 | 1.305 |
| 333.08 | 67.57  | 4.93 | 0.377 | 2.323 |
| 278.62 | 95.15  | 2.93 | 0.910 | 1.376 |
| 168.81 | 42.51  | 3.97 | 0.309 | 1.283 |
| 244.84 | 116.27 | 2.11 | 2.616 | 2.040 |
| 196.73 | 74.82  | 2.63 | 2.516 | 2.015 |
| 247.63 | 105.59 | 2.35 | 2.874 | 1.503 |
| 166.71 | 98.95  | 1.69 | 0.206 | 1.298 |
| 183.27 | 70.27  | 2.61 | 3.176 | 2.579 |
| 93.45  | 66.74  | 1.40 | 2.738 | 1.542 |
| 170.17 | 46.58  | 3.65 | 6.247 | 2.824 |
| 87.78  | 61.54  | 1.43 | 1.949 | 1.845 |
| 73.50  | 58.44  | 1.26 | 0.259 | 2.032 |
| 116.80 | 70.36  | 1.66 | 2.814 | 2.242 |
| 107.85 | 59.18  | 1.82 | 2.749 | 1.954 |
| 82.01  | 61.67  | 1.33 | 0.584 | 1.418 |
| 175.38 | 54.07  | 3.24 | 6.209 | 2.199 |
| 107.17 | 45.15  | 2.37 | 0.252 | 1.541 |
| 103.37 | 43.28  | 2.39 | 1.275 | 2.680 |
| 88.07  | 74.22  | 1.19 | 0.209 | 1.517 |
| 193.41 | 76.71  | 2.52 | 0.060 | 1.219 |
| 127.38 | 55.32  | 2.30 | 2.815 | 1.453 |
| 122.31 | 42.34  | 2.89 | 2.937 | 2.487 |
| 166.41 | 72.30  | 2.30 | 1.918 | 2.448 |
| 143.28 | 79.17  | 1.81 | 0.070 | 1.607 |
| 236.78 | 144.50 | 1.64 | 3.002 | 1.104 |
| 211.45 | 107.38 | 1.97 | 0.704 | 2.208 |
| 114.15 | 49.56  | 2.30 | 0.407 | 1.147 |
| 200.24 | 74.98  | 2.67 | 2.695 | 1.654 |
| 163.54 | 58.30  | 2.81 | 2.152 | 2.546 |
| 304.11 | 123.80 | 2.46 | 3.160 | 2.138 |
| 221.61 | 74.59  | 2.97 | 0.530 | 1.448 |
| 149.48 | 108.14 | 1.38 | 2.163 | 2.476 |
| 139.10 | 53.40  | 2.61 | 2.854 | 0.440 |
| 170.92 | 77.98  | 2.19 | 0.079 | 2.280 |
| 161.34 | 60.31  | 2.68 | 0.450 | 1.548 |
| 249.45 | 135.13 | 1.85 | 1.562 | 1.721 |
| 161.87 | 50.09  | 3.23 | 0.270 | 1.053 |
| 165.91 | 83.92  | 1.98 | 2.803 | 1.130 |
| 218.18 | 101.37 | 2.15 | 0.259 | 1.492 |
| 209.30 | 71.21  | 2.94 | 1.648 | 1.225 |



|        |        |      |       |       |
|--------|--------|------|-------|-------|
| 164.45 | 95.88  | 1.72 | 3.073 | 1.666 |
| 190.46 | 141.03 | 1.35 | 2.495 | 2.393 |
| 158.24 | 47.20  | 3.35 | 0.564 | 2.846 |
| 166.46 | 79.12  | 2.10 | 0.294 | 2.435 |
| 136.68 | 67.63  | 2.02 | 0.143 | 2.316 |
| 138.08 | 48.13  | 2.87 | 2.713 | 2.638 |
| 225.29 | 62.74  | 3.59 | 3.156 | 1.855 |
| 203.28 | 128.42 | 1.58 | 3.033 | 1.771 |
| 152.60 | 108.37 | 1.41 | 2.826 | 1.013 |
| 205.64 | 84.91  | 2.42 | 3.503 | 2.794 |
| 287.77 | 66.93  | 4.30 | 3.027 | 2.184 |
| 222.61 | 91.55  | 2.43 | 1.375 | 0.787 |
| 123.81 | 49.49  | 2.50 | 0.684 | 1.945 |
| 166.75 | 47.49  | 3.51 | 0.308 | 2.579 |
| 173.15 | 79.15  | 2.19 | 2.017 | 1.930 |
| 250.51 | 64.51  | 3.88 | 2.036 | 2.302 |
| 208.28 | 62.69  | 3.32 | 2.809 | 0.979 |
| 186.44 | 58.43  | 3.19 | 0.500 | 1.800 |
| 252.92 | 76.43  | 3.31 | 1.970 | 2.856 |
| 142.66 | 114.84 | 1.24 | 1.402 | 1.885 |
| 220.83 | 46.70  | 4.73 | 0.296 | 1.308 |
| 287.01 | 188.72 | 1.52 | 3.107 | 1.627 |
| 257.64 | 153.87 | 1.67 | 2.889 | 1.777 |
| 360.71 | 121.72 | 2.96 | 0.434 | 1.924 |
| 294.61 | 111.32 | 2.65 | 1.448 | 2.834 |
| 211.36 | 51.15  | 4.13 | 3.178 | 2.375 |
| 211.82 | 80.45  | 2.63 | 2.841 | 2.431 |
| 193.61 | 74.95  | 2.58 | 2.794 | 2.325 |
| 139.86 | 95.50  | 1.47 | 1.959 | 1.096 |
| 245.91 | 54.89  | 4.48 | 0.607 | 1.903 |
| 150.37 | 80.44  | 1.87 | 1.882 | 2.646 |
| 181.16 | 89.54  | 2.02 | 0.163 | 2.806 |
| 187.03 | 86.86  | 2.15 | 0.173 | 2.697 |
| 140.29 | 60.48  | 2.32 | 0.500 | 1.330 |
| 211.78 | 139.40 | 1.52 | 0.288 | 1.408 |
| 263.05 | 109.37 | 2.41 | 2.397 | 0.339 |
| 204.81 | 100.12 | 2.05 | 0.408 | 1.734 |
| 453.99 | 84.96  | 5.34 | 1.283 | 0.977 |
| 259.16 | 89.13  | 2.91 | 2.571 | 1.065 |
| 118.68 | 61.41  | 1.93 | 2.203 | 1.796 |
| 525.51 | 71.46  | 7.35 | 2.422 | 1.845 |
| 287.57 | 71.91  | 4.00 | 2.644 | 1.059 |
| 257.07 | 100.00 | 2.57 | 1.581 | 0.321 |
| 110.20 | 91.05  | 1.21 | 2.174 | 1.832 |
| 379.19 | 155.03 | 2.45 | 0.387 | 2.328 |
| 260.52 | 72.79  | 3.58 | 0.811 | 2.499 |
| 284.11 | 148.49 | 1.91 | 1.244 | 1.650 |

|        |        |      |       |       |
|--------|--------|------|-------|-------|
| 278.61 | 53.02  | 5.26 | 3.164 | 1.894 |
| 184.89 | 92.48  | 2.00 | 2.679 | 0.860 |
| 154.34 | 60.88  | 2.54 | 2.199 | 2.176 |
| 94.65  | 70.50  | 1.34 | 0.429 | 1.727 |
| 315.73 | 204.55 | 1.54 | 0.895 | 1.719 |
| 276.38 | 139.45 | 1.98 | 0.202 | 1.045 |
| 112.09 | 79.23  | 1.42 | 2.690 | 1.202 |
| 127.79 | 76.48  | 1.67 | 2.172 | 2.843 |
| 222.68 | 89.34  | 2.49 | 2.689 | 1.492 |
| 274.03 | 49.81  | 5.50 | 0.757 | 2.414 |
| 271.71 | 92.97  | 2.92 | 2.452 | 1.672 |
| 277.62 | 143.52 | 1.93 | 1.129 | 1.570 |
| 154.75 | 72.91  | 2.12 | 0.766 | 2.574 |
| 247.02 | 107.85 | 2.29 | 3.059 | 1.419 |
| 216.80 | 59.59  | 3.64 | 0.323 | 2.357 |
| 153.78 | 104.64 | 1.47 | 0.022 | 1.770 |
| 247.50 | 76.25  | 3.25 | 2.849 | 2.241 |
| 276.67 | 64.04  | 4.32 | 6.060 | 2.773 |
| 159.04 | 112.95 | 1.41 | 3.150 | 1.449 |
| 144.89 | 108.55 | 1.34 | 0.115 | 1.906 |
| 251.69 | 190.20 | 1.32 | 0.557 | 2.244 |
| 305.07 | 89.40  | 3.41 | 3.037 | 2.420 |
| 364.71 | 123.81 | 2.95 | 2.862 | 2.315 |
| 256.61 | 136.87 | 1.88 | 2.929 | 1.284 |
| 182.40 | 105.73 | 1.73 | 0.580 | 0.724 |
| 430.67 | 80.40  | 5.36 | 6.237 | 2.126 |
| 368.70 | 78.82  | 4.68 | 2.924 | 1.209 |
| 184.12 | 105.67 | 1.74 | 2.574 | 2.188 |
| 340.86 | 125.06 | 2.73 | 2.572 | 1.449 |
| 153.61 | 52.68  | 2.92 | 0.513 | 2.007 |
| 278.13 | 103.01 | 2.70 | 5.358 | 2.972 |
| 263.27 | 87.20  | 3.02 | 0.121 | 1.661 |
| 256.65 | 109.72 | 2.34 | 0.489 | 1.634 |
| 178.64 | 83.87  | 2.13 | 0.194 | 1.218 |
| 254.46 | 156.99 | 1.62 | 2.982 | 1.219 |
| 385.39 | 147.45 | 2.61 | 2.457 | 1.573 |
| 209.91 | 113.11 | 1.86 | 6.190 | 2.045 |
| 74.72  | 54.13  | 1.38 | 2.779 | 1.610 |
| 378.11 | 125.29 | 3.02 | 2.831 | 1.110 |
| 190.08 | 56.73  | 3.35 | 3.280 | 2.150 |
| 281.09 | 88.88  | 3.16 | 6.046 | 2.624 |
| 108.53 | 71.24  | 1.52 | 0.634 | 1.507 |
| 196.15 | 47.85  | 4.10 | 2.855 | 0.889 |
| 144.62 | 72.77  | 1.99 | 2.901 | 2.256 |
| 199.19 | 79.40  | 2.51 | 2.728 | 1.609 |
| 152.97 | 119.21 | 1.28 | 1.454 | 1.294 |
| 65.69  | 41.09  | 1.60 | 2.878 | 1.439 |

|        |        |      |       |       |
|--------|--------|------|-------|-------|
| 138.62 | 81.76  | 1.70 | 0.235 | 1.556 |
| 187.19 | 82.20  | 2.28 | 2.090 | 0.628 |
| 205.37 | 71.13  | 2.89 | 1.937 | 1.112 |
| 211.04 | 65.32  | 3.23 | 2.964 | 2.451 |
| 198.82 | 80.94  | 2.46 | 0.694 | 1.349 |
| 334.88 | 123.14 | 2.72 | 0.796 | 1.220 |
| 157.00 | 76.06  | 2.06 | 2.845 | 1.691 |
| 309.90 | 133.06 | 2.33 | 0.502 | 2.371 |
| 255.08 | 118.31 | 2.16 | 2.685 | 2.200 |
| 151.19 | 69.42  | 2.18 | 3.067 | 1.306 |
| 201.50 | 99.01  | 2.04 | 0.575 | 1.231 |
| 204.78 | 63.05  | 3.25 | 0.187 | 1.613 |
| 213.69 | 126.81 | 1.69 | 3.045 | 1.176 |
| 110.76 | 48.48  | 2.29 | 3.170 | 2.151 |
| 115.51 | 36.73  | 3.15 | 3.197 | 2.383 |
| 182.22 | 37.09  | 4.91 | 0.896 | 2.794 |
| 169.99 | 59.17  | 2.87 | 0.440 | 1.291 |
| 103.30 | 31.93  | 3.24 | 2.450 | 2.806 |
| 114.54 | 97.05  | 1.18 | 2.309 | 2.292 |
| 223.86 | 141.49 | 1.58 | 0.463 | 2.637 |
| 192.41 | 89.80  | 2.14 | 3.038 | 1.658 |
| 301.65 | 102.15 | 2.95 | 0.652 | 1.358 |
| 123.10 | 103.96 | 1.18 | 2.042 | 0.327 |
| 286.34 | 163.12 | 1.76 | 1.861 | 2.383 |
| 132.41 | 85.97  | 1.54 | 1.593 | 1.180 |
| 254.15 | 101.35 | 2.51 | 0.439 | 1.167 |
| 127.52 | 103.57 | 1.23 | 1.163 | 1.958 |
| 233.11 | 119.08 | 1.96 | 2.478 | 1.456 |
| 302.20 | 81.39  | 3.71 | 2.986 | 2.268 |
| 206.03 | 129.99 | 1.59 | 0.310 | 1.365 |
| 228.53 | 146.60 | 1.56 | 0.263 | 1.448 |
| 160.30 | 102.06 | 1.57 | 2.625 | 2.051 |
| 238.52 | 131.67 | 1.81 | 2.786 | 1.372 |
| 220.05 | 90.46  | 2.43 | 1.344 | 2.096 |
| 177.54 | 107.16 | 1.66 | 2.787 | 0.891 |
| 250.16 | 112.36 | 2.23 | 0.227 | 1.460 |
| 211.95 | 132.54 | 1.60 | 2.173 | 1.645 |
| 256.81 | 162.19 | 1.58 | 0.409 | 1.514 |
| 228.58 | 172.62 | 1.32 | 1.607 | 1.334 |
| 222.25 | 123.57 | 1.80 | 0.164 | 1.410 |
| 243.34 | 72.37  | 3.36 | 6.249 | 2.751 |
| 201.99 | 115.34 | 1.75 | 0.042 | 1.157 |
| 179.39 | 66.87  | 2.68 | 2.276 | 1.863 |
| 217.90 | 95.55  | 2.28 | 1.962 | 2.196 |
| 233.11 | 160.73 | 1.45 | 1.552 | 1.463 |
| 171.69 | 68.83  | 2.50 | 6.192 | 2.325 |
| 312.31 | 98.46  | 3.17 | 0.369 | 1.003 |

|        |        |      |       |       |
|--------|--------|------|-------|-------|
| 208.14 | 91.10  | 2.29 | 3.213 | 2.383 |
| 410.50 | 80.75  | 5.08 | 0.227 | 0.804 |
| 497.52 | 113.78 | 4.37 | 3.229 | 2.935 |
| 209.98 | 125.17 | 1.68 | 2.437 | 2.254 |
| 158.92 | 67.27  | 2.36 | 0.447 | 0.936 |
| 273.75 | 66.92  | 4.09 | 0.156 | 2.292 |
| 86.40  | 74.81  | 1.16 | 2.143 | 0.682 |
| 155.01 | 107.21 | 1.45 | 2.146 | 2.612 |
| 120.83 | 67.78  | 1.78 | 1.927 | 1.512 |
| 197.55 | 71.20  | 2.77 | 2.962 | 1.348 |
| 166.51 | 51.47  | 3.24 | 0.240 | 2.698 |
| 108.44 | 52.77  | 2.06 | 1.735 | 1.040 |
| 142.58 | 101.10 | 1.41 | 2.922 | 1.546 |
| 148.23 | 102.71 | 1.44 | 3.169 | 1.660 |
| 180.71 | 37.43  | 4.83 | 2.864 | 1.876 |
| 205.87 | 52.75  | 3.90 | 2.430 | 2.598 |
| 180.93 | 74.54  | 2.43 | 1.749 | 2.273 |
| 194.08 | 94.94  | 2.04 | 2.259 | 1.097 |
| 338.97 | 119.13 | 2.85 | 3.248 | 1.928 |
| 212.05 | 88.67  | 2.39 | 1.001 | 1.899 |
| 254.47 | 93.16  | 2.73 | 3.216 | 1.284 |
| 176.81 | 62.23  | 2.84 | 2.665 | 2.436 |
| 252.08 | 143.78 | 1.75 | 0.177 | 2.928 |
| 277.93 | 112.31 | 2.48 | 1.234 | 1.274 |
| 272.74 | 84.78  | 3.22 | 3.295 | 2.617 |
| 177.60 | 83.47  | 2.13 | 2.862 | 1.199 |
| 199.20 | 78.32  | 2.54 | 2.575 | 1.728 |
| 159.26 | 52.65  | 3.03 | 3.026 | 2.510 |
| 304.92 | 232.45 | 1.31 | 2.655 | 2.125 |
| 354.01 | 63.05  | 5.62 | 6.267 | 2.558 |
| 342.03 | 214.60 | 1.59 | 0.445 | 2.673 |
| 267.62 | 100.45 | 2.66 | 3.100 | 2.151 |
| 291.65 | 97.47  | 2.99 | 0.438 | 0.783 |
| 137.33 | 95.70  | 1.44 | 2.646 | 1.599 |
| 208.60 | 86.62  | 2.41 | 0.289 | 1.900 |
| 79.12  | 29.14  | 2.72 | 0.225 | 1.986 |
| 115.43 | 41.57  | 2.78 | 0.762 | 0.494 |
| 76.48  | 46.95  | 1.63 | 6.253 | 1.747 |
| 402.16 | 76.64  | 5.25 | 0.178 | 2.896 |
| 229.62 | 56.62  | 4.06 | 2.597 | 2.087 |
| 159.38 | 127.00 | 1.26 | 2.943 | 0.990 |
| 177.42 | 132.50 | 1.34 | 0.748 | 2.640 |
| 179.77 | 62.28  | 2.89 | 1.957 | 0.384 |
| 258.78 | 78.78  | 3.29 | 2.876 | 0.814 |
| 182.24 | 84.48  | 2.16 | 2.779 | 1.519 |
| 112.03 | 55.96  | 2.00 | 2.660 | 1.729 |
| 326.25 | 120.98 | 2.70 | 0.432 | 1.766 |

|        |        |      |       |       |
|--------|--------|------|-------|-------|
| 440.60 | 116.23 | 3.79 | 0.189 | 1.518 |
| 123.96 | 51.06  | 2.43 | 2.754 | 3.079 |
| 134.12 | 45.59  | 2.94 | 2.391 | 1.546 |
| 155.63 | 99.86  | 1.56 | 1.785 | 0.904 |
| 292.09 | 185.08 | 1.58 | 2.925 | 1.268 |
| 352.68 | 138.14 | 2.55 | 2.666 | 2.644 |
| 242.52 | 62.37  | 3.89 | 0.874 | 1.405 |
| 195.41 | 74.26  | 2.63 | 2.654 | 1.543 |
| 201.61 | 89.15  | 2.26 | 0.466 | 2.016 |
| 188.07 | 95.27  | 1.97 | 0.506 | 1.691 |
| 109.85 | 72.24  | 1.52 | 0.255 | 0.829 |
| 214.34 | 66.84  | 3.21 | 3.473 | 2.655 |
| 223.15 | 68.65  | 3.25 | 2.551 | 1.110 |
| 161.30 | 65.25  | 2.47 | 2.194 | 1.472 |
| 118.24 | 90.47  | 1.31 | 0.744 | 2.010 |
| 118.05 | 52.58  | 2.25 | 2.735 | 0.770 |
| 150.14 | 102.45 | 1.47 | 2.872 | 1.404 |
| 230.09 | 76.43  | 3.01 | 1.278 | 2.888 |
| 406.59 | 179.36 | 2.27 | 2.607 | 1.920 |
| 165.79 | 135.17 | 1.23 | 2.336 | 2.945 |
| 193.90 | 148.06 | 1.31 | 2.433 | 1.599 |
| 213.16 | 53.62  | 3.98 | 2.844 | 0.531 |
| 159.83 | 129.64 | 1.23 | 1.415 | 0.880 |
| 145.87 | 90.36  | 1.61 | 2.836 | 1.667 |
| 337.47 | 110.89 | 3.04 | 2.973 | 1.587 |
| 196.69 | 66.13  | 2.97 | 2.895 | 2.116 |
| 212.48 | 127.12 | 1.67 | 0.891 | 1.481 |
| 266.46 | 143.81 | 1.85 | 3.116 | 1.893 |
| 219.08 | 81.64  | 2.68 | 1.706 | 0.327 |
| 256.19 | 66.93  | 3.83 | 1.891 | 1.714 |
| 168.20 | 64.72  | 2.60 | 1.034 | 1.369 |
| 216.50 | 46.86  | 4.62 | 0.804 | 1.999 |
| 180.19 | 44.34  | 4.06 | 1.267 | 2.385 |
| 234.64 | 111.85 | 2.10 | 0.111 | 1.263 |
| 162.85 | 47.99  | 3.39 | 2.322 | 1.780 |
| 194.72 | 150.08 | 1.30 | 0.092 | 1.974 |
| 168.72 | 101.69 | 1.66 | 0.130 | 2.275 |
| 214.88 | 40.05  | 5.37 | 1.994 | 1.781 |
| 159.40 | 83.71  | 1.90 | 0.331 | 2.578 |
| 320.91 | 137.52 | 2.33 | 1.280 | 1.438 |
| 176.02 | 91.76  | 1.92 | 0.462 | 1.777 |
| 212.13 | 52.68  | 4.03 | 2.392 | 3.004 |
| 101.49 | 67.50  | 1.50 | 0.442 | 1.383 |
| 239.88 | 98.59  | 2.43 | 0.172 | 1.435 |
| 280.86 | 205.87 | 1.36 | 0.013 | 1.271 |
| 135.80 | 93.50  | 1.45 | 0.228 | 1.508 |
| 138.20 | 82.94  | 1.67 | 2.145 | 1.856 |

|        |        |      |       |       |
|--------|--------|------|-------|-------|
| 227.08 | 102.91 | 2.21 | 0.692 | 1.736 |
| 123.75 | 50.56  | 2.45 | 0.317 | 1.375 |
| 97.16  | 65.60  | 1.48 | 2.663 | 0.973 |
| 237.92 | 75.96  | 3.13 | 3.267 | 1.913 |
| 371.28 | 90.43  | 4.11 | 2.444 | 2.879 |
| 213.27 | 81.25  | 2.63 | 0.167 | 1.633 |
| 188.84 | 155.17 | 1.22 | 0.975 | 2.237 |
| 208.33 | 88.90  | 2.34 | 2.214 | 1.862 |
| 155.06 | 56.71  | 2.73 | 2.670 | 0.730 |
| 114.61 | 40.73  | 2.81 | 0.842 | 1.838 |
| 154.12 | 128.65 | 1.20 | 2.448 | 2.022 |
| 183.06 | 98.69  | 1.86 | 2.880 | 2.123 |
| 190.42 | 49.32  | 3.86 | 2.754 | 1.098 |
| 235.15 | 96.04  | 2.45 | 0.311 | 2.945 |
| 136.40 | 121.40 | 1.12 | 0.023 | 1.568 |
| 189.10 | 138.40 | 1.37 | 1.889 | 1.987 |
| 123.18 | 67.80  | 1.82 | 0.525 | 2.031 |
| 153.22 | 58.93  | 2.60 | 2.020 | 2.138 |
| 344.39 | 152.70 | 2.26 | 6.275 | 1.852 |
| 161.84 | 90.10  | 1.80 | 0.002 | 2.797 |
| 130.51 | 59.91  | 2.18 | 3.140 | 1.453 |
| 152.31 | 38.63  | 3.94 | 2.622 | 1.876 |
| 337.53 | 48.27  | 6.99 | 0.419 | 1.577 |
| 238.43 | 75.80  | 3.15 | 2.689 | 1.615 |
| 279.88 | 72.41  | 3.87 | 0.882 | 2.344 |
| 325.28 | 64.80  | 5.02 | 2.622 | 2.244 |
| 187.88 | 77.23  | 2.43 | 0.500 | 2.223 |
| 294.31 | 153.09 | 1.92 | 1.300 | 1.839 |
| 244.51 | 118.34 | 2.07 | 1.079 | 1.373 |
| 188.82 | 58.37  | 3.24 | 1.820 | 1.157 |
| 142.76 | 58.55  | 2.44 | 1.544 | 1.755 |
| 186.07 | 57.80  | 3.22 | 2.933 | 2.753 |
| 211.36 | 99.69  | 2.12 | 1.163 | 1.268 |
| 267.54 | 98.34  | 2.72 | 0.546 | 0.569 |
| 333.64 | 128.38 | 2.60 | 0.600 | 2.883 |
| 169.43 | 92.02  | 1.84 | 0.668 | 1.802 |
| 215.13 | 132.49 | 1.62 | 2.547 | 0.534 |
| 115.48 | 78.40  | 1.47 | 0.108 | 1.476 |
| 223.42 | 123.55 | 1.81 | 2.623 | 1.384 |
| 92.79  | 41.67  | 2.23 | 2.426 | 2.018 |
| 277.03 | 101.35 | 2.73 | 0.330 | 3.010 |
| 242.46 | 84.65  | 2.86 | 3.006 | 2.379 |
| 129.06 | 106.01 | 1.22 | 2.926 | 1.509 |
| 221.83 | 126.45 | 1.75 | 1.016 | 0.224 |
| 195.44 | 90.81  | 2.15 | 3.034 | 1.661 |
| 322.49 | 57.28  | 5.63 | 2.560 | 1.961 |
| 110.26 | 42.57  | 2.59 | 0.690 | 0.310 |

|        |        |      |       |       |
|--------|--------|------|-------|-------|
| 290.68 | 97.30  | 2.99 | 2.436 | 1.114 |
| 137.10 | 81.95  | 1.67 | 1.403 | 2.542 |
| 174.03 | 105.60 | 1.65 | 3.130 | 1.678 |
| 358.70 | 75.38  | 4.76 | 3.271 | 2.308 |
| 217.03 | 58.75  | 3.69 | 0.309 | 1.269 |
| 275.39 | 96.32  | 2.86 | 2.630 | 2.474 |
| 194.71 | 59.36  | 3.28 | 6.198 | 2.682 |
| 304.74 | 65.99  | 4.62 | 2.749 | 1.497 |
| 328.98 | 111.18 | 2.96 | 2.870 | 1.566 |
| 221.76 | 62.57  | 3.54 | 2.458 | 1.558 |
| 240.93 | 58.46  | 4.12 | 2.502 | 0.570 |
| 229.53 | 156.94 | 1.46 | 3.529 | 2.622 |
| 271.25 | 73.84  | 3.67 | 0.358 | 2.593 |
| 143.29 | 60.11  | 2.38 | 0.647 | 2.573 |
| 115.77 | 34.89  | 3.32 | 1.078 | 0.558 |
| 118.91 | 70.11  | 1.70 | 2.489 | 1.072 |
| 196.87 | 52.73  | 3.73 | 1.822 | 0.233 |
| 171.63 | 63.90  | 2.69 | 2.380 | 0.769 |
| 214.13 | 181.18 | 1.18 | 2.698 | 1.857 |
| 214.91 | 53.19  | 4.04 | 0.658 | 1.645 |
| 146.04 | 42.55  | 3.43 | 2.478 | 1.340 |
| 175.85 | 39.46  | 4.46 | 0.064 | 1.795 |
| 186.88 | 83.28  | 2.24 | 0.890 | 1.737 |
| 246.31 | 38.13  | 6.46 | 0.386 | 1.690 |
| 219.02 | 51.79  | 4.23 | 0.070 | 1.227 |
| 346.03 | 148.56 | 2.33 | 0.364 | 1.548 |
| 206.04 | 84.35  | 2.44 | 2.103 | 1.609 |
| 78.17  | 54.72  | 1.43 | 2.739 | 1.513 |
| 224.13 | 72.35  | 3.10 | 0.949 | 1.302 |
| 134.93 | 38.24  | 3.53 | 0.463 | 1.610 |
| 274.85 | 121.45 | 2.26 | 3.041 | 2.928 |
| 87.47  | 50.32  | 1.74 | 2.023 | 0.285 |
| 218.10 | 99.86  | 2.18 | 2.140 | 1.991 |
| 144.46 | 87.53  | 1.65 | 2.894 | 1.015 |
| 156.26 | 82.95  | 1.88 | 0.841 | 1.365 |
| 140.11 | 37.30  | 3.76 | 1.057 | 0.554 |
| 116.10 | 32.10  | 3.62 | 2.500 | 2.289 |
| 326.88 | 54.75  | 5.97 | 0.511 | 2.486 |
| 145.29 | 69.92  | 2.08 | 2.866 | 1.991 |
| 159.65 | 59.35  | 2.69 | 2.599 | 1.990 |
| 181.69 | 57.09  | 3.18 | 1.791 | 1.423 |
| 131.07 | 90.18  | 1.45 | 0.167 | 1.924 |
| 222.87 | 109.24 | 2.04 | 0.063 | 1.334 |
| 202.59 | 93.37  | 2.17 | 3.197 | 2.032 |
| 216.91 | 80.78  | 2.69 | 2.854 | 1.859 |
| 395.95 | 73.16  | 5.41 | 3.302 | 2.716 |
| 154.69 | 62.17  | 2.49 | 2.595 | 2.177 |

|        |        |      |       |       |
|--------|--------|------|-------|-------|
| 255.67 | 72.28  | 3.54 | 2.646 | 1.061 |
| 204.54 | 73.84  | 2.77 | 3.195 | 1.739 |
| 432.52 | 67.25  | 6.43 | 0.311 | 1.702 |
| 336.74 | 105.39 | 3.20 | 0.721 | 1.900 |
| 169.47 | 63.64  | 2.66 | 2.623 | 2.470 |
| 195.92 | 60.63  | 3.23 | 2.866 | 0.865 |
| 203.39 | 77.62  | 2.62 | 2.355 | 1.666 |
| 199.70 | 73.31  | 2.72 | 6.235 | 1.521 |
| 400.44 | 105.93 | 3.78 | 5.477 | 2.944 |
| 131.97 | 59.56  | 2.22 | 0.331 | 1.560 |
| 177.82 | 81.90  | 2.17 | 2.366 | 2.047 |
| 302.42 | 126.31 | 2.39 | 0.001 | 1.875 |
| 126.21 | 77.11  | 1.64 | 1.721 | 2.003 |
| 150.62 | 77.76  | 1.94 | 0.870 | 0.387 |
| 157.92 | 67.49  | 2.34 | 2.879 | 0.797 |
| 141.64 | 41.02  | 3.45 | 2.171 | 1.252 |
| 86.51  | 65.04  | 1.33 | 1.436 | 2.181 |
| 101.11 | 36.86  | 2.74 | 2.476 | 0.587 |
| 103.07 | 81.27  | 1.27 | 2.659 | 1.636 |
| 132.48 | 74.43  | 1.78 | 0.359 | 1.798 |
| 310.80 | 66.79  | 4.65 | 1.316 | 0.496 |
| 214.56 | 38.08  | 5.63 | 0.984 | 2.700 |
| 203.47 | 64.45  | 3.16 | 2.580 | 1.633 |
| 131.26 | 44.96  | 2.92 | 0.279 | 1.792 |
| 172.43 | 46.35  | 3.72 | 0.067 | 2.342 |
| 355.56 | 45.04  | 7.90 | 2.742 | 0.728 |
| 193.91 | 63.55  | 3.05 | 2.805 | 2.183 |
| 126.74 | 51.20  | 2.48 | 0.833 | 1.739 |
| 218.43 | 68.87  | 3.17 | 0.323 | 1.115 |
| 100.21 | 66.73  | 1.50 | 3.048 | 1.489 |
| 127.56 | 57.58  | 2.22 | 0.354 | 1.064 |
| 145.54 | 56.92  | 2.56 | 1.239 | 1.597 |
| 70.83  | 31.84  | 2.23 | 3.843 | 2.901 |
| 103.32 | 82.29  | 1.26 | 5.497 | 3.006 |
| 265.72 | 103.04 | 2.58 | 3.397 | 2.636 |
| 83.23  | 53.71  | 1.55 | 3.192 | 2.385 |
| 140.64 | 80.91  | 1.74 | 0.449 | 1.543 |
| 133.29 | 57.29  | 2.33 | 2.887 | 2.140 |
| 91.82  | 52.78  | 1.74 | 2.554 | 1.615 |
| 235.85 | 81.95  | 2.88 | 0.098 | 1.932 |
| 154.91 | 57.96  | 2.67 | 2.655 | 1.905 |
| 158.39 | 119.08 | 1.33 | 2.851 | 1.527 |
| 74.51  | 43.05  | 1.73 | 3.058 | 1.588 |
| 293.37 | 42.40  | 6.92 | 2.802 | 0.967 |
| 225.54 | 66.38  | 3.40 | 1.265 | 1.232 |
| 67.77  | 35.03  | 1.94 | 1.344 | 1.649 |
| 319.12 | 77.75  | 4.10 | 0.362 | 0.976 |



|        |        |      |       |       |
|--------|--------|------|-------|-------|
| 225.64 | 51.98  | 4.34 | 1.256 | 2.941 |
| 100.28 | 45.44  | 2.21 | 0.400 | 1.495 |
| 148.84 | 78.54  | 1.90 | 0.323 | 1.729 |
| 174.69 | 79.67  | 2.19 | 2.023 | 1.047 |
| 241.44 | 77.67  | 3.11 | 2.525 | 0.962 |
| 128.90 | 57.11  | 2.26 | 3.151 | 1.895 |
| 84.63  | 41.88  | 2.02 | 2.437 | 1.677 |
| 189.15 | 64.35  | 2.94 | 2.388 | 0.644 |
| 251.27 | 57.77  | 4.35 | 2.993 | 2.163 |
| 129.77 | 60.79  | 2.14 | 2.748 | 2.097 |
| 239.56 | 70.02  | 3.42 | 2.760 | 2.343 |
| 113.23 | 90.57  | 1.25 | 1.634 | 0.479 |
| 223.67 | 72.33  | 3.09 | 0.167 | 2.902 |
| 359.72 | 84.50  | 4.26 | 1.254 | 3.005 |
| 113.72 | 43.78  | 2.60 | 2.616 | 2.035 |
| 180.54 | 62.14  | 2.91 | 2.210 | 0.629 |
| 119.67 | 36.92  | 3.24 | 0.192 | 0.810 |
| 100.51 | 36.20  | 2.78 | 0.394 | 1.817 |
| 185.78 | 95.27  | 1.95 | 1.556 | 1.684 |
| 192.28 | 118.15 | 1.63 | 0.989 | 2.145 |
| 230.25 | 124.03 | 1.86 | 0.985 | 2.117 |
| 186.45 | 86.61  | 2.15 | 2.052 | 1.348 |
| 95.73  | 52.60  | 1.82 | 2.543 | 1.719 |
| 278.14 | 91.12  | 3.05 | 0.794 | 0.828 |
| 143.77 | 52.60  | 2.73 | 2.617 | 1.678 |
| 252.07 | 104.50 | 2.41 | 1.277 | 2.807 |
| 228.36 | 90.21  | 2.53 | 2.834 | 0.723 |
| 230.76 | 62.63  | 3.69 | 0.168 | 0.900 |
| 144.41 | 116.69 | 1.24 | 3.116 | 1.381 |
| 92.92  | 59.21  | 1.57 | 2.298 | 2.349 |
| 178.07 | 85.36  | 2.09 | 2.928 | 1.269 |
| 151.31 | 79.60  | 1.90 | 2.211 | 2.280 |
| 96.34  | 52.04  | 1.85 | 2.797 | 1.067 |
| 140.22 | 51.34  | 2.73 | 0.596 | 2.409 |
| 164.08 | 119.02 | 1.38 | 2.078 | 2.142 |
| 101.15 | 54.22  | 1.87 | 1.609 | 2.012 |
| 261.20 | 89.94  | 2.90 | 2.771 | 2.130 |
| 120.91 | 63.68  | 1.90 | 2.622 | 1.252 |
| 191.98 | 72.13  | 2.66 | 2.151 | 0.504 |
| 106.48 | 60.12  | 1.77 | 2.506 | 1.846 |
| 160.51 | 67.29  | 2.39 | 1.878 | 2.127 |
| 177.41 | 71.46  | 2.48 | 2.579 | 1.563 |
| 147.62 | 58.26  | 2.53 | 2.354 | 1.535 |
| 103.01 | 62.68  | 1.64 | 0.053 | 1.833 |
| 142.77 | 39.23  | 3.64 | 0.007 | 2.224 |
| 142.10 | 112.20 | 1.27 | 2.828 | 2.178 |
| 81.76  | 54.37  | 1.50 | 1.758 | 2.066 |

|        |        |      |       |       |
|--------|--------|------|-------|-------|
| 162.96 | 60.58  | 2.69 | 2.729 | 1.649 |
| 102.74 | 33.31  | 3.09 | 0.954 | 2.321 |
| 150.94 | 127.31 | 1.19 | 2.726 | 1.874 |
| 158.68 | 88.18  | 1.80 | 0.568 | 1.190 |
| 102.18 | 61.90  | 1.65 | 3.045 | 2.495 |
| 98.99  | 67.59  | 1.47 | 6.259 | 1.686 |
| 163.33 | 63.82  | 2.56 | 2.822 | 0.920 |
| 166.12 | 82.81  | 2.01 | 0.380 | 0.985 |
| 178.62 | 75.40  | 2.37 | 1.937 | 1.548 |
| 142.36 | 78.12  | 1.82 | 1.897 | 1.641 |
| 162.26 | 76.89  | 2.11 | 1.231 | 1.950 |
| 110.13 | 64.55  | 1.71 | 1.741 | 0.697 |
| 101.85 | 32.31  | 3.15 | 3.259 | 2.670 |
| 79.20  | 35.89  | 2.21 | 3.069 | 1.854 |
| 105.15 | 80.73  | 1.30 | 0.516 | 1.087 |
| 73.24  | 32.34  | 2.27 | 0.536 | 1.331 |
| 301.33 | 53.42  | 5.64 | 0.913 | 2.161 |
| 213.96 | 105.48 | 2.03 | 0.799 | 0.637 |
| 124.05 | 50.34  | 2.46 | 2.365 | 0.854 |
| 247.37 | 126.06 | 1.96 | 2.559 | 1.773 |
| 192.83 | 70.46  | 2.74 | 2.762 | 1.836 |
| 275.92 | 98.36  | 2.81 | 0.652 | 2.270 |
| 131.90 | 47.41  | 2.78 | 0.458 | 2.646 |
| 150.50 | 96.47  | 1.56 | 3.015 | 0.955 |
| 170.90 | 45.48  | 3.76 | 1.822 | 0.327 |
| 176.33 | 51.66  | 3.41 | 2.728 | 2.176 |
| 284.17 | 99.47  | 2.86 | 3.742 | 2.776 |
| 237.30 | 81.35  | 2.92 | 2.134 | 1.005 |
| 104.04 | 69.03  | 1.51 | 0.653 | 1.448 |
| 82.07  | 39.53  | 2.08 | 2.866 | 1.746 |
| 109.72 | 88.05  | 1.25 | 0.683 | 1.894 |
| 139.45 | 101.59 | 1.37 | 0.244 | 1.746 |
| 96.51  | 72.45  | 1.33 | 1.535 | 0.562 |
| 183.42 | 143.35 | 1.28 | 6.248 | 1.650 |
| 143.23 | 77.16  | 1.86 | 2.523 | 1.941 |
| 223.97 | 94.15  | 2.38 | 2.524 | 1.707 |
| 160.38 | 112.40 | 1.43 | 0.065 | 1.552 |
| 203.36 | 82.95  | 2.45 | 1.249 | 0.349 |
| 147.38 | 102.04 | 1.44 | 2.977 | 1.872 |
| 195.13 | 89.82  | 2.17 | 0.881 | 0.385 |
| 220.65 | 74.28  | 2.97 | 0.427 | 1.280 |
| 353.35 | 100.04 | 3.53 | 2.353 | 2.416 |
| 192.18 | 67.57  | 2.84 | 2.654 | 1.186 |
| 236.41 | 115.33 | 2.05 | 0.423 | 1.508 |
| 154.94 | 75.94  | 2.04 | 1.701 | 1.951 |
| 199.73 | 88.02  | 2.27 | 3.049 | 2.009 |
| 245.39 | 83.68  | 2.93 | 1.277 | 2.723 |

|        |        |      |       |       |
|--------|--------|------|-------|-------|
| 126.32 | 48.46  | 2.61 | 2.231 | 1.560 |
| 103.21 | 81.81  | 1.26 | 2.709 | 1.456 |
| 153.65 | 81.55  | 1.88 | 0.121 | 1.342 |
| 161.21 | 46.56  | 3.46 | 2.989 | 2.279 |
| 209.69 | 54.23  | 3.87 | 0.479 | 1.689 |
| 71.52  | 25.76  | 2.78 | 3.226 | 2.204 |
| 100.65 | 52.00  | 1.94 | 0.978 | 1.784 |
| 106.52 | 43.44  | 2.45 | 6.169 | 1.748 |
| 207.01 | 61.86  | 3.35 | 2.448 | 0.939 |
| 289.78 | 131.14 | 2.21 | 0.909 | 1.420 |
| 156.37 | 74.71  | 2.09 | 0.463 | 2.698 |
| 133.51 | 60.75  | 2.20 | 2.563 | 2.519 |
| 127.99 | 71.99  | 1.78 | 0.102 | 2.049 |
| 173.05 | 71.86  | 2.41 | 0.088 | 1.592 |
| 175.23 | 70.19  | 2.50 | 0.141 | 2.734 |
| 124.12 | 46.32  | 2.68 | 0.340 | 1.192 |
| 148.08 | 80.99  | 1.83 | 0.108 | 1.814 |
| 193.71 | 86.45  | 2.24 | 2.817 | 1.340 |
| 176.57 | 39.50  | 4.47 | 0.944 | 0.539 |
| 132.85 | 76.42  | 1.74 | 0.528 | 1.327 |
| 244.72 | 53.46  | 4.58 | 0.483 | 2.204 |
| 205.86 | 116.78 | 1.76 | 2.952 | 1.533 |
| 180.58 | 99.63  | 1.81 | 3.202 | 2.198 |
| 104.50 | 40.95  | 2.55 | 0.366 | 1.796 |
| 315.02 | 81.14  | 3.88 | 2.873 | 0.498 |
| 113.72 | 73.56  | 1.55 | 0.161 | 1.596 |
| 128.16 | 66.27  | 1.93 | 2.734 | 1.047 |
| 79.55  | 29.27  | 2.72 | 2.183 | 2.905 |
| 136.40 | 45.49  | 3.00 | 6.148 | 2.406 |
| 131.71 | 77.45  | 1.70 | 2.954 | 1.316 |
| 177.19 | 67.31  | 2.63 | 0.954 | 2.830 |
| 110.31 | 64.10  | 1.72 | 0.086 | 1.897 |
| 108.64 | 41.64  | 2.61 | 0.154 | 2.655 |
| 168.67 | 62.86  | 2.68 | 2.498 | 2.895 |
| 105.02 | 56.47  | 1.86 | 2.559 | 1.669 |
| 105.76 | 54.27  | 1.95 | 1.006 | 2.646 |
| 177.25 | 99.81  | 1.78 | 0.356 | 1.434 |
| 143.73 | 67.69  | 2.12 | 0.276 | 0.995 |
| 120.76 | 86.34  | 1.40 | 3.507 | 2.626 |
| 98.37  | 51.98  | 1.89 | 5.861 | 3.081 |
| 194.51 | 81.78  | 2.38 | 3.480 | 3.104 |
| 170.45 | 87.75  | 1.94 | 3.037 | 1.819 |
| 168.84 | 67.58  | 2.50 | 2.564 | 1.319 |
| 113.30 | 96.58  | 1.17 | 3.005 | 2.218 |
| 189.75 | 49.93  | 3.80 | 1.082 | 0.851 |
| 138.86 | 43.32  | 3.21 | 2.446 | 1.551 |
| 116.60 | 41.30  | 2.82 | 0.183 | 1.120 |

|        |        |      |       |       |
|--------|--------|------|-------|-------|
| 76.21  | 69.41  | 1.10 | 1.631 | 1.561 |
| 116.88 | 64.61  | 1.81 | 2.195 | 1.477 |
| 232.73 | 146.96 | 1.58 | 2.408 | 1.185 |
| 251.78 | 99.93  | 2.52 | 3.115 | 2.586 |
| 113.93 | 85.45  | 1.33 | 0.527 | 1.450 |
| 227.27 | 187.59 | 1.21 | 0.062 | 1.520 |
| 176.96 | 97.68  | 1.81 | 0.354 | 1.417 |
| 213.37 | 110.75 | 1.93 | 6.038 | 2.594 |
| 308.33 | 82.82  | 3.72 | 0.169 | 1.188 |
| 189.03 | 59.86  | 3.16 | 2.387 | 0.924 |
| 199.95 | 89.19  | 2.24 | 0.475 | 2.047 |
| 173.03 | 64.63  | 2.68 | 3.153 | 1.520 |
| 102.35 | 72.22  | 1.42 | 6.058 | 2.465 |
| 144.03 | 85.93  | 1.68 | 0.878 | 1.666 |
| 216.01 | 131.81 | 1.64 | 0.091 | 1.584 |
| 123.80 | 92.24  | 1.34 | 3.035 | 1.648 |
| 309.35 | 69.02  | 4.48 | 0.377 | 2.773 |
| 159.70 | 61.00  | 2.62 | 2.808 | 2.045 |
| 88.19  | 84.66  | 1.04 | 1.692 | 1.141 |
| 148.25 | 48.93  | 3.03 | 1.493 | 0.478 |
| 115.51 | 51.78  | 2.23 | 4.905 | 3.045 |
| 143.98 | 69.49  | 2.07 | 2.056 | 2.702 |
| 136.03 | 43.17  | 3.15 | 3.256 | 2.207 |
| 129.81 | 73.67  | 1.76 | 0.456 | 1.541 |
| 183.04 | 40.66  | 4.50 | 1.426 | 0.430 |
| 86.52  | 67.03  | 1.29 | 0.517 | 1.639 |
| 92.64  | 57.49  | 1.61 | 2.897 | 2.379 |
| 266.82 | 87.89  | 3.04 | 2.744 | 1.707 |
| 54.53  | 29.62  | 1.84 | 0.097 | 1.778 |
| 279.36 | 34.36  | 8.13 | 2.806 | 2.775 |
| 313.71 | 59.66  | 5.26 | 2.820 | 2.142 |
| 272.70 | 91.91  | 2.97 | 0.350 | 1.998 |
| 287.04 | 94.78  | 3.03 | 2.500 | 1.971 |
| 131.41 | 95.08  | 1.38 | 0.119 | 1.665 |
| 212.46 | 90.47  | 2.35 | 1.102 | 1.419 |
| 423.96 | 124.03 | 3.42 | 3.299 | 2.934 |
| 257.79 | 132.59 | 1.94 | 2.872 | 0.852 |
| 125.19 | 46.31  | 2.70 | 0.347 | 0.624 |
| 100.20 | 59.93  | 1.67 | 2.654 | 1.883 |
| 155.42 | 31.92  | 4.87 | 2.823 | 2.096 |
| 149.34 | 78.80  | 1.90 | 3.101 | 1.375 |
| 212.21 | 57.97  | 3.66 | 2.587 | 0.893 |
| 268.09 | 59.73  | 4.49 | 0.437 | 2.593 |
| 92.14  | 59.84  | 1.54 | 4.389 | 3.006 |
| 423.19 | 97.64  | 4.33 | 2.464 | 2.306 |
| 104.80 | 78.78  | 1.33 | 6.225 | 1.884 |
| 177.15 | 61.47  | 2.88 | 0.698 | 1.499 |

|        |        |      |       |       |
|--------|--------|------|-------|-------|
| 307.43 | 68.50  | 4.49 | 0.906 | 1.123 |
| 193.80 | 50.27  | 3.86 | 1.513 | 0.616 |
| 232.38 | 106.96 | 2.17 | 2.820 | 1.833 |
| 169.50 | 51.55  | 3.29 | 2.627 | 2.316 |
| 236.48 | 150.43 | 1.57 | 1.978 | 2.556 |
| 134.52 | 54.20  | 2.48 | 1.427 | 2.574 |
| 74.61  | 60.69  | 1.23 | 6.110 | 2.386 |
| 153.33 | 64.86  | 2.36 | 1.689 | 1.727 |
| 245.37 | 79.99  | 3.07 | 0.485 | 1.294 |
| 155.64 | 53.25  | 2.92 | 1.189 | 0.673 |
| 218.97 | 48.89  | 4.48 | 0.620 | 1.769 |
| 256.43 | 59.80  | 4.29 | 2.989 | 2.188 |
| 244.55 | 111.06 | 2.20 | 2.048 | 1.837 |
| 213.00 | 79.27  | 2.69 | 2.746 | 1.158 |
| 438.66 | 156.33 | 2.81 | 1.753 | 2.855 |
| 172.38 | 58.77  | 2.93 | 1.916 | 2.226 |
| 160.44 | 79.97  | 2.01 | 5.877 | 3.027 |
| 221.66 | 62.23  | 3.56 | 0.375 | 1.333 |
| 119.60 | 56.32  | 2.12 | 6.195 | 1.713 |
| 178.77 | 57.53  | 3.11 | 2.480 | 0.564 |
| 202.17 | 85.48  | 2.37 | 2.861 | 1.704 |
| 53.15  | 44.36  | 1.20 | 2.932 | 1.684 |
| 136.37 | 63.43  | 2.15 | 2.594 | 1.697 |
| 124.73 | 106.35 | 1.17 | 2.918 | 1.250 |
| 226.45 | 167.47 | 1.35 | 2.636 | 1.343 |
| 173.92 | 142.74 | 1.22 | 0.110 | 1.520 |
| 132.08 | 100.82 | 1.31 | 3.191 | 1.697 |
| 128.01 | 87.77  | 1.46 | 3.015 | 1.319 |
| 127.46 | 55.94  | 2.28 | 2.761 | 1.717 |
| 128.78 | 56.35  | 2.29 | 1.927 | 2.034 |
| 180.88 | 111.67 | 1.62 | 2.778 | 1.411 |
| 189.86 | 87.90  | 2.16 | 1.166 | 1.902 |
| 194.50 | 52.05  | 3.74 | 0.418 | 1.086 |
| 105.02 | 29.17  | 3.60 | 0.410 | 1.980 |
| 323.23 | 110.43 | 2.93 | 2.532 | 1.092 |
| 233.45 | 51.89  | 4.50 | 2.959 | 2.540 |
| 262.98 | 68.49  | 3.84 | 2.690 | 2.363 |
| 228.08 | 69.81  | 3.27 | 0.192 | 2.079 |
| 160.96 | 74.35  | 2.17 | 0.401 | 1.725 |
| 103.55 | 53.88  | 1.92 | 2.673 | 1.850 |
| 302.99 | 181.83 | 1.67 | 3.027 | 1.755 |
| 252.85 | 78.99  | 3.20 | 2.459 | 1.951 |
| 261.50 | 84.12  | 3.11 | 2.845 | 2.319 |
| 233.61 | 59.71  | 3.91 | 0.428 | 0.570 |
| 140.90 | 58.51  | 2.41 | 2.959 | 2.638 |
| 199.45 | 54.78  | 3.64 | 0.218 | 0.964 |
| 368.20 | 98.10  | 3.75 | 0.353 | 1.091 |

|        |        |      |       |       |
|--------|--------|------|-------|-------|
| 204.36 | 54.40  | 3.76 | 0.383 | 2.071 |
| 141.08 | 48.59  | 2.90 | 2.584 | 2.343 |
| 141.34 | 114.51 | 1.23 | 3.032 | 1.317 |
| 139.55 | 78.40  | 1.78 | 3.139 | 1.729 |
| 360.22 | 121.78 | 2.96 | 0.292 | 2.399 |
| 174.93 | 36.98  | 4.73 | 0.300 | 0.924 |
| 114.36 | 34.14  | 3.35 | 0.409 | 1.092 |
| 199.78 | 70.86  | 2.82 | 0.589 | 2.228 |
| 358.45 | 77.67  | 4.62 | 0.972 | 1.211 |
| 186.21 | 87.31  | 2.13 | 2.679 | 1.326 |
| 244.51 | 113.29 | 2.16 | 2.623 | 1.963 |
| 265.20 | 86.12  | 3.08 | 2.404 | 1.489 |
| 92.36  | 52.63  | 1.76 | 2.443 | 1.275 |
| 101.88 | 30.67  | 3.32 | 2.727 | 0.791 |
| 114.43 | 31.02  | 3.69 | 2.495 | 1.543 |
| 95.97  | 44.59  | 2.15 | 2.157 | 2.229 |
| 372.77 | 133.42 | 2.79 | 0.194 | 1.137 |
| 220.72 | 46.90  | 4.71 | 0.109 | 1.866 |
| 293.33 | 68.04  | 4.31 | 0.214 | 1.338 |
| 197.17 | 81.95  | 2.41 | 2.383 | 1.055 |
| 120.56 | 37.06  | 3.25 | 0.268 | 1.213 |
| 188.46 | 73.07  | 2.58 | 0.421 | 1.446 |
| 231.53 | 79.67  | 2.91 | 0.836 | 2.984 |
| 156.07 | 37.22  | 4.19 | 2.452 | 1.582 |
| 430.39 | 90.62  | 4.75 | 0.711 | 2.264 |
| 242.60 | 89.92  | 2.70 | 0.146 | 1.555 |
| 172.90 | 84.50  | 2.05 | 0.232 | 0.900 |
| 162.04 | 44.74  | 3.62 | 0.231 | 1.481 |
| 161.31 | 60.96  | 2.65 | 2.320 | 1.200 |
| 193.23 | 85.59  | 2.26 | 2.581 | 1.936 |
| 133.69 | 79.19  | 1.69 | 2.506 | 1.919 |
| 212.53 | 83.96  | 2.53 | 6.035 | 2.504 |
| 192.66 | 66.78  | 2.89 | 1.488 | 1.525 |
| 198.86 | 106.24 | 1.87 | 0.093 | 2.300 |
| 224.28 | 97.82  | 2.29 | 1.636 | 1.797 |
| 127.76 | 84.51  | 1.51 | 0.852 | 2.020 |
| 165.95 | 68.16  | 2.44 | 0.489 | 1.439 |
| 610.53 | 157.99 | 3.86 | 6.148 | 2.474 |
| 146.05 | 32.51  | 4.49 | 2.614 | 0.680 |
| 229.32 | 71.15  | 3.22 | 0.424 | 0.941 |
| 138.15 | 63.27  | 2.18 | 1.309 | 1.497 |
| 160.76 | 78.23  | 2.06 | 1.286 | 1.540 |
| 159.83 | 56.92  | 2.81 | 0.380 | 2.170 |
| 194.11 | 63.87  | 3.04 | 2.957 | 2.359 |
| 86.10  | 58.70  | 1.47 | 2.866 | 1.873 |
| 187.38 | 83.74  | 2.24 | 1.495 | 2.849 |
| 224.27 | 97.28  | 2.31 | 0.142 | 1.797 |

|        |        |      |       |       |
|--------|--------|------|-------|-------|
| 146.13 | 73.29  | 1.99 | 2.943 | 2.081 |
| 103.04 | 68.31  | 1.51 | 3.641 | 2.825 |
| 199.90 | 96.10  | 2.08 | 2.570 | 2.361 |
| 230.61 | 110.29 | 2.09 | 2.610 | 1.314 |
| 207.54 | 71.30  | 2.91 | 0.009 | 2.072 |
| 333.69 | 88.13  | 3.79 | 2.591 | 0.871 |
| 139.40 | 109.30 | 1.28 | 0.378 | 2.201 |
| 224.32 | 102.23 | 2.19 | 0.719 | 0.825 |
| 175.81 | 96.18  | 1.83 | 6.268 | 2.499 |
| 124.94 | 83.19  | 1.50 | 3.213 | 2.049 |
| 146.80 | 50.84  | 2.89 | 0.581 | 1.906 |
| 167.24 | 82.70  | 2.02 | 1.996 | 1.085 |
| 182.50 | 107.25 | 1.70 | 1.781 | 1.482 |
| 330.99 | 73.44  | 4.51 | 2.527 | 1.535 |
| 145.56 | 76.52  | 1.90 | 3.063 | 1.614 |
| 120.83 | 96.75  | 1.25 | 1.361 | 1.187 |
| 227.34 | 146.43 | 1.55 | 2.153 | 1.416 |
| 224.01 | 91.09  | 2.46 | 1.686 | 0.743 |
| 223.33 | 158.56 | 1.41 | 2.452 | 1.466 |
| 125.49 | 104.20 | 1.20 | 0.229 | 1.484 |
| 286.81 | 148.46 | 1.93 | 1.172 | 1.037 |
| 526.59 | 130.46 | 4.04 | 0.401 | 1.167 |
| 117.79 | 61.07  | 1.93 | 0.072 | 1.305 |
| 85.89  | 54.00  | 1.59 | 0.449 | 0.829 |
| 115.17 | 89.15  | 1.29 | 1.238 | 1.330 |
| 146.22 | 61.10  | 2.39 | 2.963 | 0.903 |
| 358.25 | 83.28  | 4.30 | 0.360 | 2.121 |
| 310.49 | 124.67 | 2.49 | 3.490 | 2.110 |
| 135.77 | 51.59  | 2.63 | 3.568 | 2.935 |
| 101.11 | 62.40  | 1.62 | 0.544 | 1.879 |
| 124.74 | 109.29 | 1.14 | 2.724 | 1.818 |
| 276.90 | 226.77 | 1.22 | 0.012 | 1.928 |
| 150.10 | 59.20  | 2.54 | 3.265 | 2.178 |
| 261.98 | 105.80 | 2.48 | 0.399 | 1.097 |
| 231.82 | 97.30  | 2.38 | 0.490 | 1.503 |
| 323.78 | 76.77  | 4.22 | 2.276 | 2.054 |
| 83.77  | 39.52  | 2.12 | 0.238 | 1.742 |
| 183.46 | 106.91 | 1.72 | 2.885 | 1.970 |
| 144.09 | 85.89  | 1.68 | 1.171 | 2.535 |
| 291.18 | 125.73 | 2.32 | 0.041 | 1.841 |
| 188.30 | 69.71  | 2.70 | 0.601 | 1.804 |
| 75.82  | 59.55  | 1.27 | 2.023 | 1.578 |
| 120.85 | 72.75  | 1.66 | 0.296 | 1.914 |
| 154.91 | 78.28  | 1.98 | 1.119 | 0.729 |
| 221.54 | 83.96  | 2.64 | 0.506 | 1.900 |
| 118.91 | 30.93  | 3.85 | 3.080 | 1.586 |
| 201.24 | 68.65  | 2.93 | 6.266 | 2.021 |

|        |        |      |       |       |
|--------|--------|------|-------|-------|
| 308.95 | 85.37  | 3.62 | 0.757 | 1.735 |
| 260.30 | 113.69 | 2.29 | 3.022 | 1.511 |
| 167.82 | 63.51  | 2.64 | 0.431 | 0.856 |
| 202.92 | 40.04  | 5.07 | 5.960 | 2.712 |
| 227.71 | 68.97  | 3.30 | 2.374 | 0.997 |
| 181.68 | 57.17  | 3.18 | 1.694 | 3.032 |
| 310.16 | 57.48  | 5.40 | 0.318 | 0.685 |
| 206.22 | 45.91  | 4.49 | 0.600 | 0.829 |
| 212.51 | 79.00  | 2.69 | 0.853 | 1.667 |
| 116.22 | 79.00  | 1.47 | 0.417 | 2.143 |
| 135.67 | 78.54  | 1.73 | 0.042 | 2.028 |
| 202.63 | 85.70  | 2.36 | 0.543 | 0.384 |
| 98.74  | 57.16  | 1.73 | 2.728 | 1.804 |
| 90.86  | 58.69  | 1.55 | 0.220 | 1.228 |
| 114.99 | 55.73  | 2.06 | 0.428 | 1.715 |
| 103.72 | 58.76  | 1.77 | 0.202 | 1.387 |
| 71.94  | 36.55  | 1.97 | 1.382 | 1.614 |
| 160.48 | 90.75  | 1.77 | 1.665 | 0.695 |
| 165.28 | 55.89  | 2.96 | 3.138 | 1.415 |
| 118.56 | 37.51  | 3.16 | 0.714 | 0.721 |
| 159.65 | 70.87  | 2.25 | 2.631 | 1.274 |
| 280.61 | 145.37 | 1.93 | 2.670 | 1.866 |
| 183.04 | 50.10  | 3.65 | 1.686 | 1.008 |
| 119.06 | 34.70  | 3.43 | 2.553 | 1.476 |
| 79.82  | 43.55  | 1.83 | 0.320 | 2.411 |
| 68.03  | 41.43  | 1.64 | 1.420 | 1.539 |
| 105.30 | 38.74  | 2.72 | 0.213 | 0.892 |
| 262.95 | 126.84 | 2.07 | 0.526 | 1.753 |
| 279.05 | 111.58 | 2.50 | 2.961 | 2.151 |
| 252.06 | 56.63  | 4.45 | 1.894 | 1.547 |
| 341.28 | 78.61  | 4.34 | 2.646 | 2.317 |
| 96.88  | 47.07  | 2.06 | 2.998 | 1.913 |
| 110.56 | 31.49  | 3.51 | 2.505 | 1.927 |
| 136.76 | 95.45  | 1.43 | 0.642 | 1.564 |
| 287.73 | 222.17 | 1.30 | 0.277 | 1.270 |
| 160.08 | 58.46  | 2.74 | 2.781 | 1.758 |
| 106.25 | 75.76  | 1.40 | 0.147 | 1.467 |
| 128.27 | 61.26  | 2.09 | 3.223 | 2.004 |
| 208.07 | 94.51  | 2.20 | 0.415 | 1.158 |
| 285.53 | 130.87 | 2.18 | 3.124 | 1.900 |
| 128.56 | 111.53 | 1.15 | 1.892 | 0.997 |
| 133.94 | 93.11  | 1.44 | 1.640 | 0.923 |
| 195.06 | 129.88 | 1.50 | 0.136 | 1.889 |
| 139.75 | 84.09  | 1.66 | 2.416 | 0.769 |
| 216.14 | 108.53 | 1.99 | 2.536 | 2.341 |
| 208.69 | 81.70  | 2.55 | 2.656 | 1.075 |
| 286.92 | 151.16 | 1.90 | 1.328 | 2.532 |



|        |        |      |       |       |
|--------|--------|------|-------|-------|
| 172.63 | 132.15 | 1.31 | 1.948 | 2.952 |
| 306.42 | 107.03 | 2.86 | 0.117 | 2.453 |
| 159.79 | 95.75  | 1.67 | 0.913 | 2.234 |
| 137.15 | 57.74  | 2.38 | 2.927 | 0.714 |
| 250.63 | 130.62 | 1.92 | 2.662 | 1.073 |
| 256.80 | 73.24  | 3.51 | 2.433 | 1.834 |
| 415.20 | 114.07 | 3.64 | 2.129 | 1.889 |
| 184.15 | 89.63  | 2.06 | 2.878 | 1.566 |
| 171.83 | 89.98  | 1.91 | 2.900 | 1.446 |
| 128.73 | 40.21  | 3.20 | 0.341 | 2.635 |
| 258.14 | 107.43 | 2.40 | 2.755 | 1.764 |
| 238.54 | 53.84  | 4.43 | 2.753 | 1.917 |
| 242.45 | 131.33 | 1.85 | 2.872 | 1.470 |
| 192.46 | 130.74 | 1.47 | 2.936 | 1.559 |
| 257.40 | 92.28  | 2.79 | 0.368 | 0.795 |
| 167.69 | 104.99 | 1.60 | 0.482 | 1.086 |
| 218.51 | 113.32 | 1.93 | 1.127 | 2.797 |
| 152.03 | 39.97  | 3.80 | 0.273 | 2.416 |
| 209.60 | 73.24  | 2.86 | 2.734 | 1.133 |
| 158.80 | 35.68  | 4.45 | 2.646 | 1.434 |
| 121.15 | 67.67  | 1.79 | 2.821 | 0.936 |
| 133.78 | 60.80  | 2.20 | 0.887 | 1.388 |
| 101.11 | 25.69  | 3.94 | 0.498 | 0.869 |
| 167.44 | 102.54 | 1.63 | 2.871 | 1.878 |
| 379.54 | 109.86 | 3.46 | 1.803 | 2.810 |
| 392.19 | 103.27 | 3.80 | 1.015 | 1.473 |
| 133.45 | 64.36  | 2.07 | 0.131 | 2.218 |
| 139.48 | 39.85  | 3.50 | 3.100 | 2.489 |
| 191.87 | 56.81  | 3.38 | 0.239 | 1.243 |
| 102.12 | 45.34  | 2.25 | 2.853 | 1.223 |
| 108.82 | 59.55  | 1.83 | 1.492 | 1.077 |
| 96.38  | 58.92  | 1.64 | 1.575 | 0.503 |
| 65.62  | 42.46  | 1.55 | 2.776 | 2.138 |
| 160.24 | 47.85  | 3.35 | 2.485 | 2.113 |
| 188.60 | 30.12  | 6.26 | 0.194 | 2.109 |
| 135.53 | 40.50  | 3.35 | 2.936 | 2.183 |
| 122.66 | 63.05  | 1.95 | 2.698 | 1.677 |
| 156.17 | 77.56  | 2.01 | 2.999 | 2.081 |
| 178.44 | 93.66  | 1.91 | 0.346 | 1.210 |
| 147.44 | 80.60  | 1.83 | 0.111 | 1.606 |
| 262.97 | 57.83  | 4.55 | 0.114 | 1.053 |
| 109.38 | 52.64  | 2.08 | 0.397 | 1.252 |
| 189.65 | 48.30  | 3.93 | 1.782 | 1.637 |
| 182.46 | 60.15  | 3.03 | 1.193 | 1.402 |
| 245.80 | 38.89  | 6.32 | 2.753 | 0.790 |
| 111.82 | 60.53  | 1.85 | 1.642 | 0.506 |
| 85.26  | 57.04  | 1.50 | 3.095 | 1.142 |

|        |        |      |       |       |
|--------|--------|------|-------|-------|
| 81.74  | 40.41  | 2.02 | 1.233 | 1.455 |
| 125.53 | 63.40  | 1.98 | 2.063 | 2.554 |
| 103.56 | 35.57  | 2.91 | 0.362 | 2.444 |
| 71.90  | 53.00  | 1.36 | 2.467 | 1.609 |
| 92.40  | 55.38  | 1.67 | 2.802 | 0.840 |
| 128.86 | 25.05  | 5.15 | 3.502 | 2.868 |
| 145.13 | 55.96  | 2.59 | 0.127 | 2.153 |
| 114.82 | 44.06  | 2.61 | 0.413 | 1.472 |
| 158.01 | 48.49  | 3.26 | 3.131 | 1.536 |
| 187.50 | 64.64  | 2.90 | 0.437 | 2.126 |
| 143.09 | 60.68  | 2.36 | 1.160 | 2.055 |
| 137.86 | 104.76 | 1.32 | 1.720 | 1.712 |
| 112.59 | 57.65  | 1.95 | 0.046 | 2.804 |
| 80.00  | 45.54  | 1.76 | 3.036 | 1.185 |
| 208.66 | 125.32 | 1.67 | 2.972 | 1.638 |
| 116.70 | 61.38  | 1.90 | 3.253 | 2.725 |
| 130.88 | 74.58  | 1.76 | 3.198 | 2.189 |
| 144.00 | 40.40  | 3.57 | 0.808 | 2.865 |
| 231.29 | 64.59  | 3.58 | 2.926 | 1.016 |
| 154.46 | 62.79  | 2.46 | 1.151 | 2.503 |
| 314.07 | 79.49  | 3.95 | 2.909 | 1.921 |
| 398.18 | 94.45  | 4.22 | 2.526 | 2.626 |
| 171.68 | 50.23  | 3.42 | 2.759 | 1.739 |
| 277.25 | 91.31  | 3.04 | 1.813 | 2.595 |
| 337.24 | 73.65  | 4.58 | 2.938 | 1.851 |
| 114.28 | 44.77  | 2.55 | 0.380 | 0.797 |
| 102.81 | 69.56  | 1.48 | 0.100 | 1.519 |
| 127.96 | 74.53  | 1.72 | 1.524 | 1.960 |
| 116.71 | 62.50  | 1.87 | 2.743 | 1.889 |
| 121.67 | 75.70  | 1.61 | 2.694 | 2.437 |
| 137.22 | 51.01  | 2.69 | 3.439 | 2.219 |

ler angle 3 (radia Active slip system (estimated from distribution of misorientaiton axes)

|       |               |
|-------|---------------|
| 4.617 | r <a>         |
| 3.607 | basal <a>     |
| 3.685 | prism <a>     |
| 4.489 | prism <a>     |
| 3.686 | indeterminate |
| 4.713 | indeterminate |
| 3.130 | z <a>         |
| 3.369 | r <a>         |
| 5.164 | prism <a>     |
| 4.206 | indeterminate |
| 3.817 | prism <a>     |
| 3.768 | prism <a>     |
| 3.645 | r <a>         |
| 3.853 | basal <a>     |
| 3.079 | indeterminate |
| 5.462 | indeterminate |
| 3.535 | indeterminate |
| 3.988 | indeterminate |
| 5.295 | indeterminate |
| 3.548 | pi' <a>       |
| 4.243 | indeterminate |
| 3.949 | indeterminate |
| 4.266 | r <a>         |
| 3.295 | indeterminate |
| 3.879 | indeterminate |
| 4.178 | indeterminate |
| 3.313 | indeterminate |
| 3.386 | indeterminate |
| 4.159 | r <a>         |
| 5.117 | prism <a>     |
| 4.110 | prism <a>     |
| 4.485 | pi <a>        |
| 3.515 | indeterminate |
| 3.603 | indeterminate |
| 5.234 | indeterminate |
| 3.637 | prism <a>     |
| 4.558 | indeterminate |
| 4.922 | indeterminate |
| 3.416 | pi <a>        |
| 4.266 | indeterminate |
| 3.210 | indeterminate |
| 5.447 | prism <a>     |
| 3.319 | basal <a>     |
| 3.583 | prism <c>     |

4.006 prism <a>  
4.925 prism <a>  
4.015 indeterminate  
3.349 basal <a>  
4.610 indeterminate  
4.082 indeterminate  
3.924 prism <c>  
4.560 basal <a>  
3.537 prism <a>  
4.037 indeterminate  
4.108 prism <a>  
3.348 prism <c>  
4.197 indeterminate  
3.787 indeterminate  
3.392 indeterminate  
4.861 indeterminate  
5.611 prism <a>  
3.272 indeterminate  
3.501 indeterminate  
5.244 indeterminate  
4.730 prism <c>  
5.064 indeterminate  
5.022 z <a>  
5.309 prism <a>  
4.413 prism <a>  
4.316 indeterminate  
3.431 indeterminate  
4.247 indeterminate  
4.792 indeterminate  
4.767 prism <a>  
4.412 indeterminate  
3.406 indeterminate  
4.027 prism <a>  
3.541 indeterminate  
5.205 prism <c>  
4.653 indeterminate  
4.499 indeterminate  
5.140 prism <a>  
4.252 basal <a>  
3.271 pi <a>  
3.232 prism <a>  
3.427 indeterminate  
4.661 pi <a>  
4.778 indeterminate  
3.087 r <a>  
5.395 r <a>  
5.066 indeterminate

4.847 indeterminate  
5.249 prism <c>  
4.806 indeterminate  
3.596 prism <c>  
4.816 indeterminate  
4.681 indeterminate  
4.676 indeterminate  
4.062 indeterminate  
4.350 indeterminate  
4.502 indeterminate  
5.182 indeterminate  
5.158 indeterminate  
4.480 indeterminate  
3.163 indeterminate  
4.277 prism <a>  
5.347 r <a>  
3.298 indeterminate  
4.782 prism <a>  
4.142 indeterminate  
3.744 indeterminate  
4.766 indeterminate  
4.680 indeterminate  
4.751 indeterminate  
4.174 prism <c>  
3.371 prism <a>  
3.186 indeterminate  
3.088 indeterminate  
5.127 prism <a>  
5.233 indeterminate  
4.344 prism <a>  
3.975 indeterminate  
5.246 indeterminate  
4.618 prism <a>  
3.086 basal <a>  
3.708 z <a>  
4.464 indeterminate  
4.268 indeterminate  
3.252 basal <a>  
4.412 prism <a>  
5.295 pi' <a>  
2.986 prism <a>  
3.628 prism <c>  
3.325 pi <a>  
3.342 indeterminate  
3.609 indeterminate  
4.014 indeterminate  
4.365 indeterminate

4.948 indeterminate  
3.834 indeterminate  
2.842 indeterminate  
3.303 prism <a>  
3.475 prism <a>  
3.782 basal <a>  
3.731 r <a>  
5.339 indeterminate  
3.523 indeterminate  
4.648 prism <a>  
4.315 prism <a>  
4.823 basal <a>  
3.148 indeterminate  
3.983 indeterminate  
4.855 z <a>  
4.090 indeterminate  
3.221 indeterminate  
2.874 indeterminate  
4.458 prism <a>  
3.488 r <a>  
3.924 indeterminate  
3.708 basal <a>  
4.836 pi <a>  
4.576 z <a>  
5.213 prism <a>  
3.535 pi <a>  
3.534 indeterminate  
3.722 prism <a>  
3.485 prism <a>  
5.029 pi <a>  
4.767 indeterminate  
4.617 prism <a>  
4.792 indeterminate  
3.648 prism <c>  
4.108 basal <a>  
3.864 indeterminate  
4.386 indeterminate  
3.190 indeterminate  
3.782 basal <a>  
5.067 indeterminate  
4.864 prism <a>  
3.529 indeterminate  
4.621 prism <a>  
4.196 indeterminate  
4.262 prism <a>  
3.343 prism <a>  
3.455 indeterminate

3.681 basal <a>  
5.325 basal <a>  
4.487 r <a>  
4.966 indeterminate  
4.788 basal <a>  
3.983 indeterminate  
3.865 indeterminate  
4.236 prism <a>  
3.675 basal <a>  
3.195 r <a>  
5.096 basal <a>  
3.660 basal <a>  
4.878 prism <a>  
4.913 prism <c>  
4.882 prism <a>  
4.760 indeterminate  
3.774 indeterminate  
2.694 indeterminate  
3.576 pi <a>  
4.939 pi <a>  
4.423 indeterminate  
3.820 prism <a>  
5.243 prism <a>  
5.185 indeterminate  
2.907 indeterminate  
4.014 indeterminate  
4.533 prism <a>  
4.920 indeterminate  
4.714 indeterminate  
2.984 prism <a>  
3.719 prism <a>  
4.333 prism <c>  
4.597 indeterminate  
3.110 indeterminate  
3.797 pi' <a>  
4.514 pi' <a>  
3.152 prism <a>  
5.223 indeterminate  
3.415 indeterminate  
4.607 indeterminate  
2.991 basal <a>  
4.520 prism <a>  
5.360 r <a>  
5.461 indeterminate  
4.602 indeterminate  
4.446 basal <a>  
5.373 basal <a>

3.980 indeterminate  
4.304 prism <a>  
4.142 pi <a>  
5.312 indeterminate  
3.894 indeterminate  
4.304 basal <a>  
3.732 basal <a>  
4.894 z <a>  
5.352 indeterminate  
4.526 indeterminate  
4.545 prism <c>  
4.647 basal <a>  
4.268 prism <a>  
4.159 pi <a>  
4.420 r <a>  
5.017 indeterminate  
3.816 indeterminate  
4.607 indeterminate  
4.087 pi <a>  
5.017 indeterminate  
5.388 basal <a>  
4.485 indeterminate  
4.227 prism <a>  
3.765 prism <a>  
4.626 prism <c>  
4.565 basal <a>  
2.989 pi <a>  
3.577 prism <a>  
5.396 prism <a>  
4.093 pi' <a>  
5.078 prism <a>  
5.112 indeterminate  
3.733 basal <a>  
5.055 indeterminate  
3.445 indeterminate  
3.942 basal <a>  
3.635 prism <a>  
3.688 basal <a>  
4.576 indeterminate  
3.623 prism <c>  
3.193 pi <a>  
4.290 indeterminate  
4.586 z <a>  
4.034 prism <a>  
3.703 indeterminate  
3.435 indeterminate  
4.129 indeterminate



4.081 z <a>  
3.702 prism <a>  
4.400 indeterminate  
4.376 prism <a>  
3.508 indeterminate  
3.668 prism <a>  
3.959 indeterminate  
4.036 prism <a>  
3.237 indeterminate  
4.241 r <a>  
3.335 prism <a>  
4.320 indeterminate  
4.943 prism <c>  
4.672 pi <a>  
4.837 indeterminate  
5.088 prism <a>  
3.850 r <a>  
5.157 pi <a>  
3.990 prism <c>  
3.349 prism <a>  
4.302 indeterminate  
4.024 indeterminate  
3.332 indeterminate  
4.412 indeterminate  
4.282 z <a>  
5.320 basal <a>  
4.957 indeterminate  
4.285 indeterminate  
4.799 indeterminate  
3.763 indeterminate  
3.789 indeterminate  
4.132 prism <a>  
4.570 indeterminate  
5.090 basal <a>  
4.521 indeterminate  
4.089 r <a>  
4.172 basal <a>  
4.655 indeterminate  
3.585 basal <a>  
5.298 pi <a>  
4.690 indeterminate  
3.106 prism <a>  
4.427 indeterminate  
4.577 prism <a>  
5.002 indeterminate  
4.883 prism <a>  
5.016 pi <a>

4.765 basal <a>  
4.911 prism <a>  
4.737 basal <a>  
4.712 indeterminate  
4.837 basal <a>  
4.019 prism <a>  
4.418 indeterminate  
3.898 indeterminate  
4.979 indeterminate  
4.622 prism <c>  
4.525 indeterminate  
4.462 z <a>  
3.920 pi <a>  
5.250 prism <c>  
3.339 r <a>  
3.808 basal <a>  
5.339 indeterminate  
3.819 prism <a>  
3.512 indeterminate  
4.449 r <a>  
4.857 prism <a>  
4.443 prism <a>  
4.327 indeterminate  
3.679 basal <a>  
5.147 r <a>  
3.595 r <a>  
4.382 prism <c>  
4.178 pi' <a>  
4.585 indeterminate  
5.087 basal <a>  
4.550 indeterminate  
4.354 basal <a>  
3.310 prism <a>  
4.049 prism <a>  
5.138 indeterminate  
4.758 indeterminate  
4.303 indeterminate  
5.236 basal <a>  
4.414 prism <a>  
3.380 indeterminate  
4.185 indeterminate  
5.276 z <a>  
4.044 basal <a>  
3.403 basal <a>  
3.655 indeterminate  
3.778 indeterminate  
3.284 prism <a>

3.412 indeterminate  
3.747 indeterminate  
4.857 basal <a>  
3.691 indeterminate  
3.780 prism <a>  
4.644 indeterminate  
3.435 prism <a>  
4.271 indeterminate  
3.314 prism <a>  
5.193 indeterminate  
4.210 indeterminate  
4.130 basal <a>  
5.191 indeterminate  
4.357 prism <a>  
4.871 pi <a>  
4.191 r <a>  
4.715 indeterminate  
4.274 prism <a>  
5.094 indeterminate  
3.448 prism <a>  
4.757 indeterminate  
4.537 prism <a>  
3.636 basal <a>  
4.434 indeterminate  
4.570 indeterminate  
3.401 prism <a>  
2.616 indeterminate  
4.878 indeterminate  
4.682 basal <a>  
4.307 r <a>  
4.650 r <a>  
3.832 prism <a>  
4.894 prism <c>  
4.286 prism <a>  
4.436 prism <a>  
3.074 indeterminate  
3.956 indeterminate  
4.079 basal <a>  
3.416 indeterminate  
4.647 r <a>  
2.426 indeterminate  
5.450 prism <a>  
5.044 indeterminate  
3.065 prism <a>  
3.882 indeterminate  
5.320 prism <a>  
3.538 prism <a>

3.409 pi <a>  
5.124 indeterminate  
3.739 pi <a>  
4.377 r <a>  
4.083 indeterminate  
3.515 indeterminate  
3.733 indeterminate  
4.566 indeterminate  
3.356 indeterminate  
3.470 indeterminate  
5.877 indeterminate  
4.369 indeterminate  
4.032 indeterminate  
4.694 prism <a>  
2.905 indeterminate  
3.557 indeterminate  
4.547 indeterminate  
3.946 prism <a>  
4.479 prism <a>  
4.996 indeterminate  
5.376 prism <c>  
3.130 indeterminate  
4.591 r <a>  
3.984 indeterminate  
3.435 prism <a>  
3.140 indeterminate  
3.836 basal <a>  
5.208 indeterminate  
4.746 indeterminate  
3.672 indeterminate  
5.356 basal <a>  
4.382 indeterminate  
4.097 basal <a>  
5.318 indeterminate  
4.225 indeterminate  
3.427 prism <a>  
5.048 basal <a>  
2.975 indeterminate  
5.056 prism <a>  
4.858 indeterminate  
3.303 indeterminate  
3.178 pi' <a>  
4.683 basal <a>  
3.926 prism <a>  
4.933 indeterminate  
4.508 indeterminate  
5.087 indeterminate

3.315 basal <a>  
4.971 indeterminate  
4.808 prism <a>  
4.832 pi <a>  
4.660 prism <a>  
3.487 prism <a>  
3.489 basal <a>  
4.023 indeterminate  
2.322 prism <a>  
4.670 indeterminate  
4.420 indeterminate  
4.613 indeterminate  
4.750 indeterminate  
3.162 prism <c>  
5.063 basal <a>  
3.514 prism <c>  
3.499 prism <a>  
5.480 indeterminate  
5.102 prism <a>  
5.061 pi <a>  
2.844 pi <a>  
3.498 prism <a>  
5.052 indeterminate  
4.446 prism <c>  
3.987 prism <a>  
3.605 indeterminate  
4.859 pi' <a>  
4.508 indeterminate  
4.475 indeterminate  
4.075 indeterminate  
4.017 pi <a>  
5.095 prism <c>  
4.909 indeterminate  
1.812 z <a>  
4.641 prism <a>  
4.192 indeterminate  
3.602 indeterminate  
4.655 prism <a>  
3.380 indeterminate  
3.294 indeterminate  
5.163 indeterminate  
5.233 indeterminate  
3.526 indeterminate  
3.514 indeterminate  
4.614 indeterminate  
3.767 basal <a>  
3.688 r <a>

3.368 indeterminate  
4.497 prism <c>  
4.871 r <a>  
3.498 indeterminate  
3.666 pi <a>  
5.382 indeterminate  
4.970 indeterminate  
3.784 prism <c>  
5.109 indeterminate  
4.990 prism <a>  
3.435 indeterminate  
4.485 prism <a>  
3.216 prism <a>  
4.152 prism <a>  
5.079 prism <a>  
5.238 indeterminate  
3.958 indeterminate  
4.763 prism <c>  
3.899 r <a>  
3.405 prism <a>  
3.197 indeterminate  
3.864 indeterminate  
3.321 basal <a>  
2.936 indeterminate  
4.851 indeterminate  
3.371 prism <a>  
3.614 indeterminate  
3.642 indeterminate  
4.504 indeterminate  
5.227 basal <a>  
4.257 prism <a>  
3.809 indeterminate  
5.373 indeterminate  
2.924 prism <a>  
4.486 prism <a>  
3.195 indeterminate  
3.874 indeterminate  
4.532 indeterminate  
5.090 prism <a>  
5.039 indeterminate  
3.780 r <a>  
5.266 indeterminate  
3.684 prism <c>  
3.190 prism <a>  
3.489 indeterminate  
4.603 z <a>  
4.700 indeterminate

5.121 basal <a>  
3.508 indeterminate  
4.939 indeterminate  
3.794 indeterminate  
5.055 prism <a>  
3.874 indeterminate  
4.318 prism <a>  
4.289 indeterminate  
3.354 indeterminate  
4.267 pi <a>  
3.498 indeterminate  
3.720 basal <a>  
5.545 indeterminate  
4.942 indeterminate  
4.112 prism <c>  
3.585 indeterminate  
3.386 indeterminate  
3.947 prism <a>  
3.514 indeterminate  
3.526 indeterminate  
5.091 basal <a>  
4.896 indeterminate  
2.890 z <a>  
4.313 prism <a>  
4.030 indeterminate  
5.138 indeterminate  
4.183 indeterminate  
3.601 pi <a>  
3.627 indeterminate  
3.608 indeterminate  
3.054 indeterminate  
3.377 prism <c>  
5.187 indeterminate  
4.137 basal <a>  
4.493 indeterminate  
4.328 prism <c>  
3.104 indeterminate  
3.554 prism <a>  
5.298 indeterminate  
4.184 prism <a>  
4.124 indeterminate  
5.099 prism <a>  
5.324 pi' <a>  
3.545 prism <c>  
5.231 indeterminate  
4.880 indeterminate  
3.467 indeterminate

|       |               |
|-------|---------------|
| 3.927 | indeterminate |
| 4.845 | indeterminate |
| 4.752 | r <a>         |
| 5.306 | pi' <a>       |
| 4.281 | indeterminate |
| 3.483 | pi <a>        |
| 3.342 | indeterminate |
| 3.998 | prism <a>     |
| 3.840 | z <a>         |
| 5.021 | indeterminate |
| 5.050 | indeterminate |
| 4.790 | prism <a>     |
| 4.107 | indeterminate |
| 3.765 | prism <a>     |
| 3.610 | prism <a>     |
| 4.031 | indeterminate |
| 2.943 | indeterminate |
| 3.520 | indeterminate |
| 3.040 | indeterminate |
| 3.711 | prism <a>     |
| 2.935 | prism <a>     |
| 4.494 | indeterminate |
| 5.052 | indeterminate |
| 3.129 | indeterminate |
| 5.380 | prism <a>     |
| 4.725 | prism <a>     |
| 3.528 | indeterminate |
| 4.322 | prism <a>     |
| 4.724 | indeterminate |
| 4.429 | indeterminate |
| 3.893 | indeterminate |
| 4.705 | indeterminate |
| 3.823 | basal <a>     |
| 4.779 | prism <a>     |
| 5.098 | indeterminate |
| 2.930 | prism <a>     |
| 3.480 | prism <c>     |
| 3.482 | prism <c>     |
| 4.551 | indeterminate |
| 2.813 | indeterminate |
| 5.897 | indeterminate |
| 4.945 | prism <c>     |
| 3.672 | prism <a>     |
| 3.838 | indeterminate |
| 3.139 | indeterminate |
| 4.534 | basal <a>     |
| 3.000 | prism <c>     |



|       |               |
|-------|---------------|
| 4.323 | indeterminate |
| 4.150 | pi' <a>       |
| 4.007 | indeterminate |
| 4.266 | indeterminate |
| 3.222 | indeterminate |
| 4.446 | prism <c>     |
| 3.404 | indeterminate |
| 3.387 | indeterminate |
| 4.046 | z <a>         |
| 5.199 | basal <a>     |
| 2.964 | indeterminate |
| 4.722 | indeterminate |
| 3.510 | indeterminate |
| 3.338 | indeterminate |
| 3.693 | indeterminate |
| 3.493 | prism <c>     |
| 2.584 | prism <a>     |
| 3.583 | indeterminate |
| 4.853 | indeterminate |
| 4.843 | indeterminate |
| 1.005 | indeterminate |
| 4.006 | indeterminate |
| 5.293 | prism <a>     |
| 4.469 | basal <a>     |
| 4.678 | prism <a>     |
| 4.510 | indeterminate |
| 5.086 | basal <a>     |
| 3.270 | indeterminate |
| 4.117 | indeterminate |
| 4.884 | indeterminate |
| 4.883 | prism <a>     |
| 4.399 | indeterminate |
| 5.303 | basal <a>     |
| 3.933 | indeterminate |
| 3.806 | indeterminate |
| 5.657 | prism <a>     |
| 4.143 | prism <a>     |
| 3.601 | indeterminate |
| 4.882 | indeterminate |
| 3.357 | r <a>         |
| 5.252 | prism <c>     |
| 3.582 | prism <a>     |
| 4.868 | indeterminate |
| 0.694 | indeterminate |
| 4.566 | indeterminate |
| 3.117 | pi' <a>       |
| 3.472 | pi <a>        |

4.193 indeterminate  
4.586 indeterminate  
3.691 pi' <a>  
4.597 indeterminate  
4.174 prism <a>  
3.420 indeterminate  
3.350 prism <a>  
5.070 indeterminate  
3.134 indeterminate  
4.935 indeterminate  
4.103 indeterminate  
5.337 prism <a>  
4.799 prism <a>  
5.372 prism <a>  
4.425 prism <a>  
4.065 indeterminate  
2.894 indeterminate  
3.992 indeterminate  
3.103 indeterminate  
3.838 z <a>  
5.023 indeterminate  
3.882 indeterminate  
5.266 pi <a>  
5.375 basal <a>  
3.330 prism <a>  
4.966 indeterminate  
3.925 indeterminate  
3.525 pi' <a>  
4.671 indeterminate  
4.275 indeterminate  
4.357 indeterminate  
3.910 indeterminate  
3.894 basal <a>  
3.477 indeterminate  
4.968 pi <a>  
3.949 indeterminate  
4.141 indeterminate  
4.433 prism <a>  
4.962 prism <a>  
4.951 indeterminate  
3.429 pi' <a>  
4.659 basal <a>  
4.972 indeterminate  
3.867 indeterminate  
5.376 r <a>  
3.270 indeterminate  
3.054 indeterminate

4.693 indeterminate  
5.124 indeterminate  
3.412 basal <a>  
3.820 pi' <a>  
4.109 indeterminate  
4.374 basal <a>  
4.005 indeterminate  
4.455 r <a>  
3.050 prism <c>  
4.265 pi <a>  
4.304 indeterminate  
4.419 indeterminate  
3.406 basal <a>  
5.377 indeterminate  
4.652 indeterminate  
4.372 r <a>  
3.242 prism <a>  
4.147 basal <a>  
3.780 indeterminate  
5.047 prism <a>  
3.426 indeterminate  
3.557 indeterminate  
4.041 prism <a>  
3.789 basal <a>  
4.854 indeterminate  
2.999 prism <c>  
4.814 indeterminate  
4.069 indeterminate  
3.651 indeterminate  
3.344 indeterminate  
4.961 indeterminate  
3.891 indeterminate  
4.797 prism <c>  
3.540 indeterminate  
4.370 indeterminate  
4.336 indeterminate  
3.452 prism <c>  
3.514 prism <a>  
3.824 indeterminate  
4.536 indeterminate  
5.439 indeterminate  
4.452 prism <a>  
4.331 prism <a>  
4.423 z <a>  
5.185 indeterminate  
3.669 indeterminate  
3.056 pi' <a>

5.224 basal <a>  
4.916 prism <a>  
3.609 indeterminate  
5.065 indeterminate  
4.174 indeterminate  
4.192 indeterminate  
4.551 r <a>  
3.138 indeterminate  
4.169 prism <a>  
4.400 prism <a>  
3.216 indeterminate  
3.578 pi <a>  
4.706 basal <a>  
5.208 prism <a>  
5.314 basal <a>  
4.821 indeterminate  
5.278 r <a>  
4.101 indeterminate  
3.611 indeterminate  
3.281 prism <c>  
3.247 prism <a>  
4.597 indeterminate  
4.539 prism <a>  
4.385 indeterminate  
3.843 basal <a>  
3.513 pi <a>  
4.334 indeterminate  
4.604 z <a>  
5.774 prism <a>  
3.183 indeterminate  
3.463 indeterminate  
4.327 z <a>  
4.421 basal <a>  
4.750 indeterminate  
4.775 prism <a>  
4.322 pi' <a>  
3.895 indeterminate  
3.205 pi <a>  
3.684 r <a>  
3.185 prism <a>  
4.791 basal <a>  
4.144 indeterminate  
3.260 prism <a>  
4.902 basal <a>  
4.430 basal <a>  
4.446 basal <a>  
4.560 prism <a>

3.460 indeterminate  
3.324 indeterminate  
4.427 prism <a>  
3.958 prism <a>  
3.961 indeterminate  
4.042 indeterminate  
4.818 prism <a>  
4.806 z <a>  
4.872 indeterminate  
4.637 prism <a>  
4.279 indeterminate  
3.284 indeterminate  
5.298 basal <a>  
3.051 indeterminate  
3.411 indeterminate  
4.813 indeterminate  
5.122 indeterminate  
3.471 basal <a>  
4.101 indeterminate  
3.283 basal <a>  
5.243 basal <a>  
5.145 z <a>  
4.629 indeterminate  
4.642 indeterminate  
2.957 prism <a>  
3.979 prism <c>  
3.599 pi' <a>  
3.873 indeterminate  
3.504 r <a>  
3.990 basal <a>  
4.686 prism <a>  
3.432 indeterminate  
4.646 indeterminate  
4.613 pi' <a>  
3.945 prism <c>  
5.330 indeterminate  
4.659 prism <c>  
3.840 indeterminate  
3.175 basal <a>  
4.195 prism <c>  
4.249 indeterminate  
3.297 indeterminate  
4.112 indeterminate  
3.527 basal <a>  
4.410 indeterminate  
3.646 prism <c>  
3.978 indeterminate

3.984 prism <a>  
4.464 prism <a>  
4.989 indeterminate  
5.486 indeterminate  
5.064 indeterminate  
4.669 r <a>  
4.025 indeterminate  
3.494 prism <a>  
4.252 indeterminate  
4.479 indeterminate  
5.162 indeterminate  
3.859 indeterminate  
3.357 indeterminate  
4.197 basal <a>  
3.689 prism <a>  
4.544 pi <a>  
3.288 prism <a>  
4.370 prism <a>  
4.381 basal <a>  
5.152 indeterminate  
4.602 prism <a>  
4.349 prism <c>  
3.732 indeterminate  
4.679 basal <a>  
4.025 prism <a>  
3.655 basal <a>  
3.994 indeterminate  
5.095 indeterminate  
3.622 prism <c>  
3.568 indeterminate  
4.107 indeterminate  
4.691 basal <a>  
5.116 z <a>  
4.063 basal <a>  
4.627 indeterminate  
4.107 indeterminate  
3.847 prism <c>  
4.671 z <a>  
3.377 indeterminate  
4.346 prism <c>  
3.919 indeterminate  
4.214 indeterminate  
4.449 indeterminate  
4.699 indeterminate  
5.234 prism <a>  
3.429 indeterminate  
3.969 indeterminate

3.914 indeterminate  
4.345 prism <a>  
3.935 indeterminate  
5.369 indeterminate  
3.477 indeterminate  
5.187 indeterminate  
3.043 prism <a>  
4.477 indeterminate  
3.803 prism <c>  
3.588 prism <a>  
4.528 indeterminate  
3.523 prism <a>  
3.816 indeterminate  
5.200 z <a>  
4.928 indeterminate  
4.439 indeterminate  
4.518 prism <a>  
4.967 indeterminate  
3.665 prism <a>  
3.278 indeterminate  
5.384 basal <a>  
4.664 pi' <a>  
4.820 indeterminate  
4.332 prism <a>  
4.797 basal <a>  
3.921 basal <a>  
4.079 indeterminate  
4.339 indeterminate  
5.200 indeterminate  
5.198 prism <a>  
4.516 indeterminate
